# Supplementary material for: Phylogenomic analysis of trichomycterid catfishes (Teleostei: Siluriformes) inferred from ultraconserved elements
Source: PubMed Central journal article supplement (PMC7021825; doi:10.1038/s41598-020-59519-w), 2020-02-14
Supplement: 41598_2020_59519_MOESM1_ESM.pdf [file 41598_2020_59519_MOESM1_ESM.pdf]

## Supplementary material

### Phylogenomic analysis of trichomycterid catfishes (Teleostei: Siluriformes) inferred from ultraconserved elements

Luz E. Ochoa<sup>a,b</sup>, Aléssio Datovo<sup>b</sup>, Carlos DoNascimento<sup>c</sup>, Fabio F. Roxo<sup>a</sup>, Mark H. Sabaj<sup>d</sup>, Jonathan Chang<sup>e</sup>, Bruno F. Melo<sup>a</sup>, Gabriel S. C. Silva<sup>a</sup>, Fausto Foresti<sup>a</sup>, Michael Alfaro<sup>c</sup>, Claudio Oliveira<sup>a</sup>.

<sup>a</sup>*Departamento de Morfologia, Instituto de Biociências, Universidade Estadual Paulista, Botucatu, SP, Brazil*

<sup>b</sup>*Museu de Zoologia da Universidade de São Paulo, São Paulo, SP, Brazil*

<sup>c</sup>*Instituto de Investigación de Recursos Biológicos Alexander von Humboldt, Villa de Leyva, Boyacá, Colombia*

<sup>d</sup>*The Academy of Natural Sciences of Drexel University, Philadelphia, PA, USA*

<sup>e</sup>*Department of Ecology and Evolutionary Biology, University of California, Los Angeles, CA, USA*

Corresponding author

Luz E. Ochoa - luzecho@gmail.com

**Table 1.** Taxonomic sampling, catalog and tissue number, geographic distribution of the samples included in this study.

| Subfamily       | Genus               | Species                           | Specimen Voucher | Tissue Voucher | River                   | Basin             | Country | Acession Number SRA | Coordinates                 |
|-----------------|---------------------|-----------------------------------|------------------|----------------|-------------------------|-------------------|---------|---------------------|-----------------------------|
| Trichogeninae   | <i>Trichogenes</i>  | <i>Trichogenes longipinnis</i>    | LBP3862          | 22411          | Cachoeira do amor       | Atlantico         | Brazil  | SAMN11320811        | S23°21'06.8' W 44°45'48.9"  |
| Copionodontinae | <i>Copionodon</i>   | <i>Copionodon orthiocarinatus</i> | LBP17354         | 17354          | Mucujê                  | Paraguaçu         | Brazil  | SAMN11320812        | S 12°57'04" W 41°16'38"     |
|                 |                     | <i>Copionodon pecten</i>          | LBP17357         | 38993          | Mucujê                  | Paraguaçu         | Brazil  | SAMN11320813        | S 12°55'32" W 41°20'04"     |
|                 |                     | <i>Copionodon</i> sp.             | LBP17361         | 59311          | Mucujê                  | Paraguaçu         | Brazil  | SAMN11320814        | S 13°17'20" W 41°16'04"     |
|                 | <i>Glaphyropoma</i> | <i>Glaphyropoma spinosum</i>      | LBP17359         | 17359          | Gruta dos torres        | Paraguaçu         | Brazil  | SAMN11320815        | S 12°52'40" W 41°18'43"     |
| Glanapteryginae | <i>Listrura</i>     | <i>Listrura camposi</i>           | LBP7438          | 35362          | Riacho sem nome         | Ribeira do Iguape | Brazil  | SAMN11320816        | S 24°15'06.3" W 47°14'53.8" |
|                 |                     | <i>Listrura picinguabae</i>       | LBP3864          | 22423          | Afluente rio da Fazenda | Ribeira do Iguape | Brazil  | SAMN11320817        | S 23°20'57.6' W 44°51'03.4" |

| Subfamily       | Genus                    | Species                                       | Specimen Voucher | Tissue Voucher | River             | Basin             | Country   | Acession Number SRA | Coordinates   |               |
|-----------------|--------------------------|-----------------------------------------------|------------------|----------------|-------------------|-------------------|-----------|---------------------|---------------|---------------|
|                 | <i>Pygidianops</i>       | <i>Pygidianops</i> sp.1                       | ANSP190504       | 2115           | Asita             | Orinoco           | Venezuela | SAMN11320818        | N 05°5'20"    | W 65°50'32.7" |
|                 |                          | <i>Pygidianops</i> sp. 2                      | ANSP190505       | 2113           | Asita             | Orinoco           | Venezuela | SAMN11320819        | N 05°5'20"    | W 65°50'32.7" |
|                 | <i>Typhlobelus</i>       | <i>Typhlobelus guacamaya</i>                  | ANSP190503       | 2114           | Cuao              | Orinoco           | Venezuela | SAMN11320820        | N 4°59'52.4"  | W 67°36'3.6"  |
|                 | <i>New genus</i>         | <i>Undescribed genus</i>                      | LBP16842         | 69447          | Fau               | Ribeira do Iguape | Brazil    | SAMN11320821        | S 24°12'26.5" | W 47°28'36.9" |
| Sarcoglanidinae | <i>Microcambeva</i>      | <i>Microcambeva barbata</i>                   | LBP21985         | 21985          | Aldeia Velha      | Paraíba do Sul    | Brazil    | SAMN11320822        | S 22°29'17.1" | W 42°16'14.5" |
|                 | <i>Sarcoglanis</i>       | <i>Sarcoglanis simplex</i> 1                  | ANSP179212       | 872            | Ireng             | Takutu            | Guyana    | SAMN11320823        | N 04°1'10"    | W 59°36'6"    |
|                 |                          | <i>Sarcoglanis simplex</i> 2                  | ANSP180021       | 2201           | Takutu            | Takutu            | Guyana    | SAMN11320824        | N 03°21'18"   | W 59°49'51"   |
|                 | <i>Stauroglanis</i>      | <i>Stauroglanis gouldingi</i>                 | LBP3159          | 19301          | Negro             | Amazonas          | Brazil    | SAMN11320825        | S 02°45'16.6" | W 59°37'30.9" |
| Tridentinae     | <i>Potamoglanis</i>      | <i>Potamoglanis hasemani</i> 1                | LBP4483          | 24450          | Negro             | Amazonas          | Brazil    | SAMN11320827        | S 00°53'18.6" | W 62°40'36.1" |
|                 |                          | <i>Potamoglanis hasemani</i> 2                | LBP4483          | 24450          | Negro             | Amazonas          | Brazil    | SAMN11320826        | S 00°53'18.6" | W 62°40'36.1" |
|                 | <i>Tridens</i>           | <i>Tridens</i> sp.2 (madeira)                 | LBP12070         | 12070          | Madeira           | Amazonas          | Brazil    | SAMN11320828        | S 8°11'46"    | W 63°51'48"   |
|                 | <i>Tridentopsis</i>      | <i>Tridentopsis pearsoni</i>                  | LBP13944         | 13944          | Branco            | Amazonas          | Brazil    | SAMN11320829        | S 10°45.710'  | W 68°23.564"  |
|                 | <i>Tridensimilis</i>     | <i>Tridensimilis brevis</i>                   | LBP13940         | 13940          | Tapajos           | Amazonas          | Brazil    | SAMN11320830        | S 04°55'58.8" | W 56°51'51.6" |
| Stegophilinae   | <i>Acanthopoma</i>       | <i>Acanthopoma annectens</i>                  | ANSP181146       | 890            | Amazonas          | Amazonas          | Perú      | SAMN11320831        | S 03°40'36"   | W 73°14'37"   |
|                 | <i>Haemomaster</i>       | <i>Haemomaster venezuelae</i>                 | INPA43789        | 10704          | Xingu             | Amazonas          | Brazil    | SAMN11320832        | S 03°33'10.7" | W 51°51'22.2" |
|                 | <i>Henonemus</i>         | <i>Henonemus intermedius</i>                  | LBP2394          | 16454          | Araguaia          | Amazonas          | Brazil    | SAMN11320833        | S 15°53'35.2" | W 52°15'00.9" |
|                 |                          | <i>Henonemus punctatus</i>                    | LBP4146          | 23679          | Jurua             | Amazonas          | Brazil    | SAMN11320834        | S 07°26'35.5" | W 73°03'33.5" |
|                 |                          | <i>Henonemus</i> sp.                          | ANSP197334       | 12772          | Jarauçu           | Amazonas          | Brazil    | SAMN11320835        | S 01°51'30.4" | W 52°26'46.3" |
|                 | <i>Homodiaetus</i>       | <i>Homodiaetus anisitsi</i>                   | LBP13194         | 55163          | Camaquã           | Lagoa dos Patos   | Brazil    | SAMN11320836        | S 30°44'28.8" | W 51°46'25.1" |
|                 |                          | <i>Homodiaetus passarellii</i>                | LBP2502          | 16505          | Macacu            | Atlantico         | Brazil    | SAMN11320837        | S 22°31'31.6" | W 42°41'17.2" |
|                 | <i>Megalocentor</i>      | <i>Megalocentor echthrus</i>                  | ANSP199997       | 4732           | Itaya             | Amazonas          | Perú      | SAMN11320838        | S 03°43'25"   | W 73°12'26"   |
|                 | <i>Ochmacanthus</i>      | <i>Ochmacanthus alternus</i>                  | LBP4351          | 24088          | Igarapé do cajual | Amazonas          | Brazil    | SAMN11320839        | N 03°11'00.8" | W 60°33'20.0" |
|                 |                          | <i>Ochmacanthus</i> sp.1 (Itaya)              | ANSP191769       | 4748           | Itaya             | Amazonas          | Brazil    | SAMN11320840        | S 03°49'59"   | W 73°18'07"   |
|                 |                          | <i>Ochmacanthus</i> sp.2 (Itatá)              | ANSP197613       | 11339          | Itaya             | Amazonas          | Brazil    | SAMN11320841        | S 03°37'14.6" | W 51°49'15"   |
|                 |                          | <i>Ochmacanthus reinhardti</i>                | LBP10987         | 50481          | Lajeado           | Amazonas          | Brazil    | SAMN11320842        | S 10°26'23.5" | W 65°20'34.1" |
|                 | <i>Pareiodon</i>         | <i>Pareiodon microps</i>                      | ANSP191783       | 4707           | Amazonas          | Amazonas          | Brazil    | SAMN11320843        | S 3°43'25"    | W 73°12'26"   |
|                 | <i>Pseudostegophilus</i> | <i>Pseudostegophilus cf nemurus</i> (Orinoco) | ANSP198977       | 13134          | Apure             | Orinoco           | Venezuela | SAMN11320844        | N 07°49'2.8"  | W 67°21'41.3" |
|                 |                          | <i>Pseudostegophilus nemurus</i>              | LBP1581          | 11769          | Das Garças        | Araguaia          | Brazil    | SAMN11320845        | S 15°54'18.1" | W 52°19'24.2" |

| Subfamily        | Genus                 | Species                            | Specimen Voucher | Tissue Voucher | River         | Basin         | Country   | Acession Number SRA | Coordinates    |                |
|------------------|-----------------------|------------------------------------|------------------|----------------|---------------|---------------|-----------|---------------------|----------------|----------------|
|                  |                       | <i>Pseudostegophilus paulensis</i> | LBP6738          | 6738           | Tiete         | Paraná        | Brazil    | SAMN11320846        | S 21°11'35"    | W 49°07'22"    |
|                  |                       | <i>Pseudostegophilus</i> sp        | LBP5133          | 26235          | Paraguai      | Paraná        | Brazil    | SAMN11320847        | S 16°06'66"    | W 57°44'33"    |
|                  | <i>Stegophilus</i>    | <i>Stegophilus panzeri</i>         | LBP8619          | 43462          | Tapajos       | Amazonas      | Brazil    | SAMN11320848        | S 14°08'39.8"  | W 56°05'48.6"  |
| Vandelliinae     | <i>Paracanthopoma</i> | <i>Paracanthopoma parva</i>        | LBP2498          | 15495          | Araguaia      | Amazonas      | Brazil    | SAMN11320849        | S 15°42'43.4"  | W 52°15'32.1"  |
|                  |                       | <i>Paracanthopoma</i> sp.1 (Nanay) | ANSP199868       | 4948           | Nanay         | Amazonas      | Perú      | SAMN11320850        | S 03°45'8.8"   | W 73°17'0.1"   |
|                  |                       | <i>Paracanthopoma</i> sp.2 (Xingu) | ANSP198315       | 12408          | Xingu         | Amazonas      | Perú      | SAMN11320851        | S 03°24'54.3"  | W 51°42'42.1"  |
|                  |                       | <i>Paracanthopoma</i> sp. (Jari)   | LBP5245          | 26466          | Jari          | Amazonas      | Brazil    | SAMN11320852        | S 00°50'38''   | W 52°28'59''   |
|                  |                       | <i>Vandellia beccarii</i>          | LBP10155         | 47557          | Apure         | Orinoco       | Venezuela | SAMN11320853        | N 07°37'24.4"  | W 66°24'48.0"  |
|                  |                       | <i>Vandellia cirrhosa</i>          | ANSP191329       | 3936           | Ventuari      | Orinoco       | Venezuela | SAMN11320854        | N 5°3'2.6"     | W 65°37'28.5"  |
|                  |                       | <i>Vandellia sanguinea</i>         | LBP15976         | 66164          | Xingu         | Amazonas      | Brazil    | SAMN11320855        | S 13°29'41.8"  | W 53°04'57.7"  |
|                  |                       | <i>Vandellia</i> sp.1 (Araguaia)   | LBP1631          | 11765          | Araguaia      | Amazonas      | Brazil    | SAMN11320856        | S 15°53'35.2"  | W 52°15'00.9"  |
|                  |                       | <i>Vandellia</i> sp. 2 (Araguaia)  | LBP2477          | 16449          | Araguaia      | Amazonas      | Brazil    | SAMN11320857        | S 15°53'35.2"  | W 52°15'00.9"  |
|                  |                       | <i>Vandellia</i> sp. 3 (Araguaia)  | LBP2477          | 16450          | Araguaia      | Amazonas      | Brazil    | SAMN11320858        | S 15°53'35.2"  | W 52°15'00.9"  |
|                  |                       | <i>Vandellia</i> sp. (Perú)        | LBP14854         | 57887          | Amazonas      | Amazonas      | Perú      | SAMN11320859        |                |                |
|                  |                       | <i>Vandellia</i> sp. (Tamshiyacu)  | ANSP197186       | 11246          | Tamshiyacu    | Amazonas      | Perú      | SAMN11320860        | S 04°1'41.3"   | W 73°8'45.2"   |
|                  |                       | <i>Vandellia</i> sp. (Ventuari)    | LBP5342          | 26973          | Ventuari      | Orinoco       | Venezuela | SAMN11320861        | S 00°29'09''   | W 52°41'29''   |
| Trichomyeteridae | <i>Bullockia</i>      | <i>Bullockia maldonadoi</i> 1      | LBP3112          | 3112           | La Laja       | Bio Bio       | Chile     | SAMN11320862        | S 37°12'54.8"  | W 72°26'49.1"  |
|                  |                       | <i>Bullockia maldonadoi</i> 2      | LBP3112          | 19793          | La Laja       | Bio Bio       | Chile     | SAMN11320863        | S 37°12'54.8"  | W 72°26'49.1"  |
|                  | <i>Cambeva</i>        | <i>Cambeva balios</i>              | LBP607           | 7358           | Tainhas       | Taquari-Antas | Brazil    | SAMN11320864        | S 29°24,109'   | W 50°27,026    |
|                  |                       | <i>Cambeva cubataonis</i>          | LBP3123          | 19690          | Itapocu       | Atlantico     | Brazil    | SAMN11320865        | S 26°28'17.2"  | W 49°10'55.1"  |
|                  |                       | <i>Cambeva davisi</i> (Iguaçu)     | LBP1222          | 10598          | Iguaçu        | Atlantico     | Brazil    | SAMN11320868        | S 25°52.438'   | W 49°43.404'   |
|                  |                       | <i>Cambeva davisi</i>              | LBP6383          | 29744          | Preto         | La Plata      | Brazil    | SAMN11320867        | S 23°57.270'   | W 51°06.843'   |
|                  |                       | <i>Cambeva iheringi</i>            | LBP4512          | 24563          | Paranapiacaba | Paraná        | Brazil    | SAMN11320866        | S 23°46'13.2"  | W 46°18'39.6"  |
|                  |                       | <i>Cambeva perkos</i>              | LBP17033         | 66403          | Uruguay       | Uruguay       | Brazil    | SAMN11320870        | S 28°08'03.4"  | W 52°18'40.7"  |
|                  |                       | <i>Cambeva poikilos</i>            | LBP14693         | 61154          | Carreiro      | Uruguay       | Brazil    | SAMN11320871        | S 28°43'54.0"  | W 51°50'23.6"  |
|                  |                       | <i>Cambeva pascuali</i>            | LBP23323         |                | Tamandua      | Paranapanema  | Brazil    | SAMN11320869        | S 23°13'27.06" | W 48°31'45.34" |
|                  |                       | <i>Cambeva</i> sp (Santa Catarina) | LBP3121          | 19686          | Itapocu       | Atlantico     | Brazil    | SAMN11320872        | S 26°28'17.2"  | W 49°10'55.1"  |
|                  |                       | <i>Cambeva stawiarski</i>          | LBP16165         | 66905          | Cachoeira     | Paraguay      | Brazil    | SAMN11320873        | S 25°22'09.9"  | W 54°06'49.7"  |

| Subfamily | Genus                 | Species                             | Specimen Voucher | Tissue Voucher | River                 | Basin             | Country  | Acession Number SRA | Coordinates    |                 |
|-----------|-----------------------|-------------------------------------|------------------|----------------|-----------------------|-------------------|----------|---------------------|----------------|-----------------|
|           |                       | <i>Cambeva zonatus</i>              | LBP2653          | 17409          | Ribeira do Iguape     | Ribeira do Iguape | Brazil   | SAMN11320874        | S 24°41'11.8"  | W 48°59'40.3"   |
|           | <i>Eremophilus</i>    | <i>Eremophilus mutisii</i>          | no voucher       | 11306          | Laguna de Funque      | Magdalena         | Colombia | SAMN11320875        | N 05°27'15"    | W 73°44'40"     |
|           | <i>Ituglanis</i>      | <i>Ituglanis amazonicus</i>         | LBP2442          | 16211          | Araguaia              | Amazonas          | Brazil   | SAMN11320876        | S 15°52'40.4"  | W 52°18'15.5"   |
|           |                       | <i>Ituglanis boitata</i>            | LBP14546         | 60865          | Jacui                 | Lagoa dos Patos   | Brazil   | SAMN11320877        | S 29°33'53.4"  | W 53°17'08.1"   |
|           |                       | <i>Ituglanis cf amazonicus</i>      | LBP11003         | 50532          | Madeira               | Amazonas          | Brazil   | SAMN11320878        | S 10°26'23.5"  | W 65°20'34.1"   |
|           |                       | <i>Ituglanis cf eichorniarum</i>    | LBP10777         | 49859          | Paraguay              | Paraguay          | Brazil   | SAMN11320879        | S 18°25'24.4"  | W 54°50'05.9"   |
|           |                       | <i>Ituglanis cf goya</i>            | LBP17131         | 68592          | Das Almas             | Tocantins         | Brazil   | SAMN11320880        | S 13°45'18.5"  | W 47°27'20.0"   |
|           |                       | <i>Ituglanis cf parkoi</i>          | LBP7995          | 37376          | Tapajos               | Amazonas          | Brazil   | SAMN11320881        | S 14°08'14.1"  | W 56°05'48.6"   |
|           |                       | <i>Ituglanis eichorniarum</i>       | LBP4686          | 24825          | Paraguay              | Paraguay          | Brazil   | SAMN11320882        | S 14°41'44"    | W 57°15'35"     |
|           |                       | <i>Ituglanis goya</i>               | LBP17137         | 68599          | Dos Couros            | Tocantins         | Brazil   | SAMN11320883        | S 14°09'46.8"  | W 47°37'52.4"   |
|           |                       | <i>Ituglanis herberti</i>           | LBP676           | 8028           | Pirai                 | Paraná            | Brazil   | SAMN11320884        | S 16°25,680'   | W 56°25,143'    |
|           |                       | <i>Ituglanis parahybae</i>          | LBP10730         | 49719          | Macabu                | Paraíba do Sul    | Brazil   | SAMN11320885        | S 22°04'07.8"  | W 41°54'36.2"   |
|           |                       | <i>Ituglanis parkoi</i>             | LBP14153         | 59188          | Tapajos               | Amazonas          | Brazil   | SAMN11320886        | S 04°43'13.8"  | W 56°44'24.3"   |
|           |                       | <i>Ituglanis ramiroi</i>            | LBP15293         | 63261          | Rio São Bernardo      | Tocantins         | Brazil   | SAMN11320887        | S 13°44'15.9"  | W 46°21'48.8"   |
|           |                       | <i>Ituglanis</i> sp. (Araguaia)     | LBP1857          | 13264          | Insula                | Araguaia          | Brazil   | SAMN11320888        | S 15°32'54.2"  | W 52°12'17.7"   |
|           |                       | <i>Ituglanis</i> sp. (Das Brancas)  | LBP19465         | 77969          | Das Brancas           | Tocantins         | Brazil   | SAMN11320889        | S 14°53'50.7"  | W 47°35'00.2"   |
|           |                       | <i>Ituglanis</i> sp. (Cuiaba)       | LBP12960         | 55688          | Rio Cuiaba            | Paraguai          | Brazil   | SAMN11320890        | S 17°49'51.6"  | W 57°23'42.8"   |
|           |                       | <i>Ituglanis</i> sp. (Joao dias)    | LBP7667          | 36475          | Corrego João Dias     | La Plata          | Brazil   | SAMN11320891        | S 20°20'33.6"  | W 55°43'34.2"   |
|           |                       | <i>Ituglanis</i> sp. (Ribeira)      | LBP7416          | 35678          | Batatau               | Ribeira do Iguape | Brazil   | SAMN11320892        | S 24°35'25.5"  | W 48°16'29.9"   |
|           |                       | <i>Ituglanis</i> sp. (Tapajos)      | LBP16129         | 66849          | Tapajos               | Amazonas          | Brazil   | SAMN11320893        | S 04°33'09.7"  | W 56°17'59.6"   |
|           |                       | <i>Ituglanis</i> sp. (Xingu)        | INPA47781        | 11584          | Xingu                 | Amazonas          | Brazil   | SAMN11320894        | S 03°37'14.6"  | W 51°49'15"     |
|           | <i>Scleronema</i>     | <i>Scleronema minutum</i>           | LBP3310          | 19841          | Arroio dos Corrientes | Atlantico         | Brazil   | SAMN11320895        | S 31°28'46.3"  | W 52°12'46.9"   |
|           | <i>Trichomycterus</i> | <i>Trichomycterus aff spilosoma</i> | LBP19339         | 77975          | Dos Bocas             | Atlantico         | Ecuador  | SAMN11320896        | S03°16'07.6"   | W079°44'14.8"   |
|           |                       | <i>Trichomycterus aff striatus</i>  | LBP19846         | 77969          | Magdalena             | Magdalena         | Colombia | SAMN11320897        | N 04°29'11.0"  | W 75°15'10"     |
|           |                       | <i>Trichomycterus albinotatus</i>   | LBP6326          | 29802          | Paraiba do sul        | Paraíba do Sul    | Brazil   | SAMN11320898        | S 22°39'19.6"  | W 44°34'44.0"   |
|           |                       | <i>Trichomycterus alternatus</i>    | LBP1014          | 10261          | Chopoto               | São francisco     | Brazil   | SAMN11320899        | S 21°08.947'   | W 43°23.973'    |
|           |                       | <i>Trichomycterus areolatus</i>     | LBP3118          | 19819          | Maichin               | Maichin           | Chile    | SAMN11320900        | S 39°20'41.3"  | W 71°34'27.0"   |
|           |                       | <i>Trichomycterus banneai</i>       | LBP19847         | 77973          | Magdalena             | Magdalena         | Colombia | SAMN11320901        | N 03°43'3,971" | W 74°55'43.958" |

| Subfamily | Genus | Species                                       | Specimen Voucher    | Tissue Voucher | River            | Basin          | Country  | Acession Number SRA | Coordinates         |                    |
|-----------|-------|-----------------------------------------------|---------------------|----------------|------------------|----------------|----------|---------------------|---------------------|--------------------|
|           |       | <i>Trichomycterus brasiliensis</i>            | LBP10675            | 49540          | São Francisco    | São francisco  | Brazil   | SAMN11320902        | S 18°13'48.0"       | W 45°13'52.7"      |
|           |       | <i>Trichomycterus cachiraensis</i>            | LBP19832            | 77957          | Galvanes         | Magdalena      | Colombia | SAMN11320903        | N 07°42'21.3"       | W 73°02'09.2"      |
|           |       | <i>Trichomycterus candidus</i>                | LBP11630            | 58011          | Paraná           | Paraná         | Brazil   | SAMN11320904        | S 19°41'32.0"       | W 47°42'58.6"      |
|           |       | <i>Trichomycterus chapmani</i> 1              | CZUT-IC17749        | Q53            | Santo Domingo    | Magdalena      | Colombia | SAMN11320905        | N 04° 31' 19.4"     | W 75° 37' 33.7"    |
|           |       | <i>Trichomycterus chapmani</i> 2              | CZUT-IC17061        | L9             | La vieja         | Cauca          | Colombia | SAMN11320906        | N 12° 42' 47.73"    | W 83° 51' 6.34"    |
|           |       | <i>Trichomycterus chiltoni</i>                | ANSP180474          | 940            | Andalien         | Andalien       | Chile    | SAMN11320907        | S 36°48'30"         | W 73°1'32"         |
|           |       | <i>Trichomycterus cf. areolatus</i> (La Laja) | LBP3113             | 3113           | La Laja          | Bio Bio        | Chile    | SAMN11320908        | S 37°12'54.8"       | W 72°26'49.1"      |
|           |       | <i>Trichomycterus cf. areolatus</i> (Maichin) | LBP3118             | 19820          | Maichin          | Maichin        | Chile    | SAMN11320909        | S 39°20'41.3"       | W 71°34'27.0"      |
|           |       | <i>Trichomycterus cf. auroguttatus</i>        | LBP8374             | 40446          | Paraíba do sul   | Paraíba do Sul | Brazil   | SAMN11320910        | S 21°14'07.4'       | W 43°30'50.5"      |
|           |       | <i>Trichomycterus cf. banneauti</i>           | LBP19537            | 77971          | Magdalena        | Magdalena      | Colombia | SAMN11320911        | N 06°02'09.0"       | W 74°58'56.0"      |
|           |       | <i>Trichomycterus cf. brasiliensis</i> 1      | LBP8060             | 37829          | Grande           | La Plata       | Brazil   | SAMN11320912        | S 22°40'33.2"       | W 45°40'58.3"      |
|           |       | <i>Trichomycterus cf. brasiliensis</i> 2      | LBP6247             | 29199          | Grande           | La Plata       | Brazil   | SAMN11320913        | S 21°19'44.8"       | W 46°30'04.6"      |
|           |       | <i>Trichomycterus cf. brasiliensis</i> 3      | LBP10276            | 47976          | Grande           | La Plata       | Brazil   | SAMN11320914        | S 20°17'11.6'       | W 46°34'55.0"      |
|           |       | <i>Trichomycterus cf. guianensis</i>          | ANSP179111          | 918            | Orokang          | Mazaruni       | Guyana   | SAMN11320915        | N 5°31'31"          | W 60°13'56"        |
|           |       | <i>Trichomycterus cf. knerii</i>              | LBP18717            | 18717          | Meta/caño Guamal | Orinoco        | Colombia | SAMN11320916        | N<br>03°52'10.413"  | W<br>73°46'15.138" |
|           |       | <i>Trichomycterus cf. oroyae</i>              | LBP3255             | 3255           | Chontabamba      | Amazonas       | Perú     | SAMN11320917        | W<br>S 10°36'06.6'' | W<br>075°29'10.8'' |
|           |       | <i>Trichomycterus cf. septemradiatus</i>      | LBP5939             | 28065          | São Domingos     | Grande         | Brazil   | SAMN11320918        | S 21°22'48.1"       | W 46°28'29.7"      |
|           |       | <i>Trichomycterus cf. taenia</i>              | CZUT-IC NJ82 T24437 |                | Dagua            | Pacifico       | Colombia | SAMN11320919        | N<br>03°37'14.104"  | W<br>76°40'53.407" |
|           |       | <i>Trichomycterus guianensis</i>              | LBP17444            | 69015          | Potaro           | Essequibo      | Guyana   | SAMN11320920        | N<br>05°20'16.0''   | W<br>59°33'57.0''  |
|           |       | <i>Trichomycterus immaculatus</i>             | LBP8351             | 40419          | Piçarrão         | Doce           | Brazil   | SAMN11320921        | S 19°40'53.8'       | W 43°00'50.1"      |
|           |       | <i>Trichomycterus itatiaye</i>                | LBP16356            | 62282          | Paraíba do sul   | Paraíba do Sul | Brazil   | SAMN11320922        | S<br>22°28'46.595'  | W<br>44°34'1.978"  |
|           |       | <i>Trichomycterus mimosensis</i>              | LBP8290             | 38358          | Jequitinhonha    | Jequitinhonha  | Brazil   | SAMN11320923        | S 17°13'14.0'       | W 42°35'46.0"      |
|           |       | <i>Trichomycterus nigroauratus</i>            | LBP6301             | 29341          | Itagaçaba        | Paraíba do Sul | Brazil   | SAMN11320924        | S 22°39'26.3"       | W 44°45'49.8"      |
|           |       | <i>Trichomycterus pauciradiatus</i>           | LBP16323            | 61977          | São Francisco    | São francisco  | Brazil   | SAMN11320925        | S 20°57'20.1"       | W 43°45'43.9"      |
|           |       | <i>Trichomycterus pirabitira</i>              | LBP18381            | 72641          | Grande           | La Plata       | Brazil   | SAMN11320926        | S 21°8'53''         | W 46°14'95''       |
|           |       | <i>Trichomycterus piratymbara</i>             | LBP9004             | 42138          | Grande           | La Plata       | Brazil   | SAMN11320927        | S 20°37'25.4"       | W 46°13'49.5"      |
|           |       | <i>Trichomycterus pradensis</i>               | LBP8291             | 38359          | Jequitinhonha    | Jequitinhonha  | Brazil   | SAMN11320928        | S 17°13'14.0'       | W 42°35'46.0"      |
|           |       | <i>Trichomycterus punctulatus</i>             | ANSP180733          | 905            | Pisco            | Pisco          | Perú     | SAMN11320929        | S 13°40'            | W 75°46'18"        |

| Subfamily      | Genus               | Species                                   | Specimen Voucher | Tissue Voucher | River                     | Basin         | Country   | Accession Number SRA | Coordinates                    |
|----------------|---------------------|-------------------------------------------|------------------|----------------|---------------------------|---------------|-----------|----------------------|--------------------------------|
|                |                     | <i>Trichomycterus quechuorum</i>          | ANSP180572       | 912            | Mapacho                   | Mapacho       | Perú      | SAMN11320930         | S 13°37'3" W 71°24'4"          |
|                |                     | <i>Trichomycterus reinhardti</i>          | LBP16302         | 61942          | São Francisco             | São francisco | Brazil    | SAMN11320931         | S 20°11'40.5" W 44°06'05.1"    |
|                |                     | <i>Trichomycterus ruitoquensis</i>        | LBP19838         | 77956          | Magdalena                 | Magdalena     | Colombia  | SAMN11320932         | N 07°04'08.5" W 73°04'13.5"    |
|                |                     | <i>Trichomycterus sandovali</i>           | LBP19833         | 77946          | Don Juan cave             | Magdalena     | Colombia  | SAMN11320933         | N 06°48'13.5" W 73°16'23.1"    |
|                |                     | <i>Trichomycterus septemradiatus</i>      | LBP6550          | 31670          | Das Velhas                | São francisco | Brazil    | SAMN11320934         | S 20°00'37.1" W 43°58'08.3"    |
|                |                     | <i>Trichomycterus</i> sp. (Arica-Mirim)   | LBP7640          | 36427          | Afluyente rio Aricá-Mirim | La Plata      | Brazil    | SAMN11320935         | S 15°46'03.8" W 55°30'44.5"    |
|                |                     | <i>Trichomycterus</i> sp. (Bonito)        | LBP11648         | 58088          | Bonito                    | Paraná        | Brazil    | SAMN11320936         | S 18°37'15.6" W 48°36'30.7"    |
|                |                     | <i>Trichomycterus</i> sp. (Casca)         | LBP7669          | 36484          | Afluyente rio da Casca    | Paraguai      | Brazil    | SAMN11320937         | S 16°55.491' W 55°45.191'      |
|                |                     | <i>Trichomycterus</i> sp. (Corrego)       | LBP10236         | 47789          | Corrego sem nome          | La Plata      | Brazil    | SAMN11320938         | S 15°46'36.9" W 55°30'09.8"    |
|                |                     | <i>Trichomycterus</i> sp. (Coxipo-açu)    | LBP7674          | 36488          | Afluyente rio Coxipo-Açu  | La Plata      | Brazil    | SAMN11320939         | S 15°07'36.2' W 55°58.563'     |
|                |                     | <i>Trichomycterus</i> sp. (Grande)        | LBP10282         | 47992          | Araguari                  | La Plata      | Brazil    | SAMN11320940         | S 20°08'47.3' W 46°40'11.1"    |
|                |                     | <i>Trichomycterus</i> sp. (Grotão)        | LBP11631         | 58082          | Paraná                    | Paraná        | Brazil    | SAMN11320941         | S 19°41'32.0" W 47°42'58.6"    |
|                |                     | <i>Trichomycterus</i> sp (Manco)          | LBP19834         | 77958          | Manco                     | Magdalena     | Colombia  | SAMN11320942         | N 06°50'58.1" W 72°59'19.2"    |
|                |                     | <i>Trichomycterus</i> sp (Paria)          | ANSP191470       | 2083           | Peninsula de Paria        | Atlantico     | Venezuela | SAMN11320943         | N 10°39' W 62°34'              |
|                |                     | <i>Trichomycterus</i> sp. (Turvo)         | LBP9001          | 42123          | Grande                    | La Plata      | Brazil    | SAMN11320944         | S 20°35'44.9" W 46°13'16.6"    |
|                |                     | <i>Trichomycterus</i> sp. (São Francisco) | LBP11842         | 58147          | Córrego da Agua Santa     | São francisco | Brazil    | SAMN11320945         | S 20°08'47.3" W 46°40'11.1"    |
|                |                     | <i>Trichomycterus</i> sp. (Sepotuba)      | LBP8563          | 43332          | Sepotuba                  | Paraguay      | Brazil    | SAMN11320946         | S 14°20'32.6" W 57°31'22.5"    |
|                |                     | <i>Trichomycterus</i> sp. (Samaná Norte)  | CZUT-IC17547     | 8              | Samaná Norte              | Magdalena     | Colombia  | SAMN11320947         | N 6°11'48.869" W 74°47'41.107" |
|                |                     | <i>Trichomycterus</i> sp.4 (Riecito)      | CZUT-IC20105     | 562            | Riecito                   | Magdalena     | Colombia  | SAMN11320948         | N 2°0'34.381" W 75°46'41.362"  |
|                |                     | <i>Trichomycterus</i> sp. (Rancheria)     | IMCN8442         | 1              | Rancheria                 | Rancheria     | Colombia  | SAMN11320949         |                                |
|                |                     | <i>Trichomycterus trasandianus</i> 1      | LBP19845         | 77964          | Magdalena                 | Magdalena     | Colombia  | SAMN11320950         | N 4°27'55.7" W 75°12'21.1"     |
|                |                     | <i>Trichomycterus trasandianus</i> 2      | CZUT-IC18148     | 657            | Combeima                  | Magdalena     | Colombia  | SAMN11320951         | N 4°31'02.3" W 75°18'28.0"     |
| Nematogenyidae | <i>Nematogenys</i>  | <i>Nematogenys inermis</i>                | LBP3105          |                | Andalien                  | Pacifico      | Chile     | SAMN11320952         | S 36°50.304' W 72°55.642'      |
| Callichthyidae | <i>Corydoras</i>    | <i>Callichthys callichthys</i>            | LBP17423         | 69177          | São Francisco             | São francisco | Brazil    | SAMN11320964         | S 19°37'56.4" W 44°02'47.4"    |
|                |                     | <i>Corydoras elegans</i>                  | LBP14804         | 57701          | Aquarium                  | Amazonas      | Perú      | SAMN11320953         |                                |
|                |                     | <i>Corydoras gossei</i>                   | LBP544           | 7171           | Aquarium                  | Amazonas      | Brazil    | SAMN11320954         |                                |
|                | <i>Hoplosternum</i> | <i>Hoplosternum littorale</i>             | LBP466           | 7282           | Parapananema              | Parapananema  | Brazil    | SAMN11320955         | S 19°34.630' W 57°01.123'      |
| Scoloplacidae  | <i>Scoloplax</i>    | <i>Scoloplax dicra</i>                    | LBP11001         | 50522          | Lajeado                   | Amazonas      | Brazil    | SAMN11320956         | S 10°26'23.5" W 65°20'34.1"    |

| Subfamily     | Genus                | Species                           | Specimen Voucher | Tissue Voucher | River        | Basin     | Country  | Accession Number SRA | Coordinates   |               |
|---------------|----------------------|-----------------------------------|------------------|----------------|--------------|-----------|----------|----------------------|---------------|---------------|
|               |                      | <i>Scoloplax distolothrix</i>     | LBP1938          | 14340          | Itiquira     | Piquiri   | Brazil   | SAMN11320957         | S 17°28'13"   | W 55°14'46.7" |
| Loricariidae  | <i>Farlowella</i>    | <i>Farlowella oxyrryncha</i>      | LBP1558          | 11509          | Das mortes   | Amazonas  | Brazil   | SAMN11320958         | S 15°29'57.3" | W 52°12'10.4" |
|               | <i>Lamontichthys</i> | <i>Lamontichthys filamentosus</i> | LBP162           | 4093           | Branco       | Amazonas  | Brazil   | SAMN11320959         | S 10°03,320'  | W 67°51,450'  |
|               | <i>Lasiancistrus</i> | <i>Lasiancistrus saetiger</i>     | LBP9156          | 42517          | Guamá        | Amazonas  | Brazil   | SAMN11320960         | S 01°34'28.3" | W 47°02'03.5" |
| Astroblepidae | <i>Astroblepus</i>   | <i>Astroblepus grivalvii</i>      | ANSP188920       | 188920         | Dormilon     | Magdalena | Colombia | SAMN11320961         | N 06°2'47.5"  | W 75°29'24.8" |
|               |                      | <i>Astroblepus</i> sp             | LBP19836         | 77952          | Frio         | Magdalena | Colombia | SAMN11320962         | N 07°04'08.5" | W 73°04'13.5" |
| Characidae    | <i>Leporinus</i>     | <i>Leporinus striatus</i>         | LBP3180          | 16871          | Paranapanema | Paraná    | Brazil   | SAMN11320963         | S 23°20'      | W 48°34'      |

**Table 2.** Summary values describing the number of trimmed reads, number of contigs assembled, total base pair of contigs, number of UCE contigs, mean length of all contigs and their average coverage for samples.

| Subfamily       | Genus                | Species                            | Voucher    | Tissue number | Number of trimmed reads | Contigs assembled | Total bp contigs | UCE contigs | Mean length | Total bp UCES |
|-----------------|----------------------|------------------------------------|------------|---------------|-------------------------|-------------------|------------------|-------------|-------------|---------------|
| Trichogeninae   | <i>Trichogenes</i>   | <i>Trichogenes longipinnis</i>     | LBP3862    | 22411         | 2,575,084               | 13076             | 7957424          | 1,713       | 324         | 554,165       |
| Copionodontinae | <i>Copionodon</i>    | <i>Copionodon orthiocarinathus</i> | LBP17354   | 17354         | 2,649,930               | 12142             | 5260402          | 1,652       | 759         | 1,253,244     |
|                 |                      | <i>Copionodon pecten</i>           | LBP17357   | 38993         | 2,000,677               | 8543              | 3738395          | 1,486       | 711         | 1,056,864     |
|                 |                      | <i>Copionodon</i> sp.              | LBP17361   | 59311         | 2,612,582               | 23120             | 9688341          | 1,673       | 274         | 458,776       |
|                 | <i>Glaphyropoma</i>  | <i>Glaphyropoma spinosum</i>       | LBP17359   | 17359         | 2,554,783               | 10115             | 4218198          | 1,669       | 658         | 1,098,364     |
| Glanapteryginae | <i>Listrura</i>      | <i>Listrura camposi</i>            | LBP7438    | 35362         | 1,229,746               | 4325              | 2721299          | 1,140       | 230         | 262,012       |
|                 |                      | <i>Listrura pinguabae</i>          | LBP3864    | 22423         | 3,637,164               | 4162              | 2484286          | 1,118       | 680         | 760,094       |
|                 | <i>Pygidianops</i>   | <i>Pygidianops</i> sp.1            | ANSP190504 | 2113          | 5,484,465               | 36085             | 15192123         | 1,349       | 357         | 481,481       |
|                 |                      | <i>Pygidianops</i> sp.2            | ANSP190505 | 2115          | 4,191,971               | 33264             | 14520463         | 1,317       | 971         | 1,278,855     |
|                 | <i>Typhlobelus</i>   | <i>Typhlobelus guacamaya</i>       | ANSP190503 | 2114          | 2,060,441               | 10035             | 5709065          | 1,407       | 900         | 1,265,817     |
|                 | <i>New genus</i>     | <i>Undescribed genus</i>           | LBP16842   | 69447         | 1,532,438               | 7655              | 4261083          | 1,389       | 789         | 1,095,306     |
| Sarcoglanidinae | <i>Microcambeva</i>  | <i>Microcambeva barbata</i>        | LBP21985   | 21985         | 335,526                 | 1524              | 591364           | 825         | 321         | 264,617       |
|                 | <i>Sarcoglanis</i>   | <i>Sarcoglanis simplex</i> 1       | ANSP179212 | 872           | 1,965,651               | 16050             | 7708086          | 1,396       | 848         | 1,183,777     |
|                 |                      | <i>Sarcoglanis simplex</i> 2       | ANSP180021 | 2201          | 6,483,210               | 29490             | 12177368         | 1,400       | 859         | 1,202,544     |
|                 | <i>Stauroglanis</i>  | <i>Stauroglanis gouldingi</i>      | LBP3159    | 19301         | 3,892,538               | 12136             | 6098347          | 1,359       | 333         | 451,943       |
| Tridentinae     | <i>Potamoglanis</i>  | <i>Potamoglanis hasemani</i> 1     | LBP4483    | 24450         | 1,205,504               | 6025              | 3130825          | 1,002       | 209         | 209,577       |
|                 |                      | <i>Potamoglanis hasemani</i> 2     | LBP4483    | 23971         | 1,438,585               | 10781             | 5483335          | 1,326       | 809         | 1,073,929     |
|                 | <i>Tridens</i>       | <i>Tridens</i> sp. 2 (Madeira)     | LBP12070   | 12070         | 1,809,411               | 6719              | 3671354          | 1,087       | 244         | 264,959       |
|                 | <i>Tridentopsis</i>  | <i>Tridentopsis pearsoni</i>       | LBP13944   | 13944         | 2,120,8                 | 6391              | 3384015          | 1,229       | 777         | 955,174       |
|                 | <i>Tridensimilis</i> | <i>Tridensimilis brevis</i>        | LBP13940   | 13940         | 1,340,964               | 5266              | 2858644          | 995         | 205         | 204,215       |
| Stegophilinae   | <i>Acanthopoma</i>   | <i>Acanthopoma annectens</i>       | ANSP181146 | 890           | 2,038,992               | 4948              | 2938044          | 1,146       | 780         | 893,573       |
|                 | <i>Haemomaster</i>   | <i>Haemomaster venezuelae</i>      | INPA43789  | 10704         | 568,892                 | 1842              | 832244           | 776         | 391         | 303,698       |
|                 | <i>Henonemus</i>     | <i>Henonemus intermedius</i>       | LBP2394    | 16454         | 2,716,966               | 7615              | 4315084          | 1,314       | 886         | 1,164,658     |
|                 |                      | <i>Henonemus punctatus</i>         | LBP4146    | 23679         | 1,796,713               | 3711              | 2112946          | 1,100       | 689         | 757,526       |



| Subfamily    | Genus                    | Species                                               | Voucher    | Tissue number | Number of trimmed reads | Contigs assembled | Total bp contigs | UCE contigs | Mean length | Total bp UCES |
|--------------|--------------------------|-------------------------------------------------------|------------|---------------|-------------------------|-------------------|------------------|-------------|-------------|---------------|
|              |                          | <i>Henonemus</i> sp.                                  | ANSP197334 | 12772         | 1,277,443               | 4624              | 2665717          | 1,215       | 782         | 950,038       |
|              | <i>Homodiaetus</i>       | <i>Homodiaetus anisitsi</i>                           | LBP13194   | 55163         | 1,473,577               | 4332              | 2894165          | 1,017       | 708         | 720,310       |
|              |                          | <i>Homodiaetus passarellii</i>                        | LBP2502    | 16505         | 4,460,737               | 8092              | 4532053          | 1,197       | 722         | 864,681       |
|              | <i>Megalocentor</i>      | <i>Megalocentor echthrus</i>                          | ANSP199997 | 4732          | 1,083,727               | 3432              | 2115847          | 1,042       | 686         | 714,668       |
|              | <i>Ochmacanthus</i>      | <i>Ochmacanthus alternus</i>                          | LBP4351    | 24088         | 477,062                 | 3988              | 2118212          | 1,146       | 708         | 811,688       |
|              |                          | <i>Ochmacanthus</i> sp.1 (Itaya)                      | ANSP191769 | 4748          | 631,989                 | 4568              | 2494743          | 1,151       | 747         | 859,683       |
|              |                          | <i>Ochmacanthus</i> sp.2 (Itatá)                      | ANSP197613 | 11339         | 848,287                 | 5107              | 2743488          | 1,167       | 776         | 905,513       |
|              |                          | <i>Ochmacanthus reinhardti</i>                        | LBP10987   | 50481         | 3,092,031               | 6605              | 3326668          | 1,111       | 644         | 715,516       |
|              | <i>Pareiodon</i>         | <i>Pareiodon microps</i>                              | ANSP191783 | 4707          | 2,544,499               | 7770              | 3679016          | 1,206       | 733         | 884,259       |
|              | <i>Pseudostegophilus</i> | <i>Pseudostegophilus</i> cf. <i>nemurus</i> (Orinoco) | ANSP198977 | 13134         | 2,807,759               | 8109              | 3859728          | 1,219       | 745         | 907,922       |
|              |                          | <i>Pseudostegophilus nemurus</i>                      | LBP1581    | 11769         | 2,365,757               | 4401              | 2545956          | 1,172       | 706         | 827,767       |
|              |                          | <i>Pseudostegophilus paulensis</i>                    | LBP6738    | 6738          | 1,214,052               | 7046              | 4235997          | 632         | 621         | 392,332       |
|              |                          | <i>Pseudostegophilus</i> sp                           | LBP5133    | 26235         | 1,389,668               | 5440              | 3226705          | 1,238       | 765         | 947,393       |
|              | <i>Stegophilus</i>       | <i>Stegophilus panzeri</i>                            | LBP8619    | 43462         | 148,566                 | 1621              | 873199           | 874         | 548         | 478,939       |
| Vandelliinae | <i>Paracanthopoma</i>    | <i>Paracanthopoma parva</i>                           | LBP2498    | 15495         | 1,667,541               | 4246              | 2457937          | 1,056       | 761         | 804,078       |
|              |                          | <i>Paracanthopoma</i> sp 1 (Nanay)                    | ANSP199868 | 4948          | 1,651,943               | 6372              | 3443818          | 1,058       | 786         | 831,110       |
|              |                          | <i>Paracanthopoma</i> sp 2 (Xingu)                    | ANSP198315 | 12408         | 1,278,393               | 4019              | 2033520          | 862         | 601         | 518,277       |
|              |                          | <i>Paracanthopoma</i> sp. (Jari)                      | LBP5245    | 26466         | 2,418,434               | 9260              | 4492239          | 1,008       | 499         | 502,673       |
|              | <i>Vandellia</i>         | <i>Vandellia beccarii</i>                             | LBP10155   | 47557         | 4,203,329               | 17319             | 6977762          | 1,007       | 855         | 860,930       |
|              |                          | <i>Vandellia cirrhosa</i>                             | ANSP191329 | 3936          | 451,062                 | 2420              | 1636640          | 840         | 853         | 716,888       |
|              |                          | <i>Vandellia sanguinea</i>                            | LBP15976   | 66164         | 2,030,908               | 4431              | 2611384          | 981         | 708         | 694,309       |
|              |                          | <i>Vandellia</i> sp.1 (Araguaia)                      | LBP1631    | 11765         | 1,799,338               | 5008              | 2772867          | 906         | 745         | 675,354       |
|              |                          | <i>Vandellia</i> sp.2 (Araguaia)                      | LBP2477    | 16449         | 2,509,744               | 7479              | 3899098          | 928         | 711         | 659,797       |
|              |                          | <i>Vandellia</i> sp.3 (Araguaia)                      | LBP2477    | 16450         | 3,582,938               | 12596             | 5934891          | 957         | 684         | 654,135       |
|              |                          | <i>Vandellia</i> sp. (Perú)                           | LBP14854   | 57887         | 1,187,003               | 3262              | 1916526          | 895         | 735         | 658,087       |
|              |                          | <i>Vandellia</i> sp. (Tamshiyacu)                     | ANSP197186 | 11246         | 1,131,701               | 4328              | 2996114          | 977         | 866         | 845,847       |

| Subfamily        | Genus              | Species                                 | Voucher   | Tissue number | Number of trimmed reads | Contigs assembled | Total bp contigs | UCE contigs | Mean length | Total bp UCES |
|------------------|--------------------|-----------------------------------------|-----------|---------------|-------------------------|-------------------|------------------|-------------|-------------|---------------|
|                  |                    | <i>Vandellia</i> sp. (Ventuari)         | LBP5342   | 26973         | 2,201,698               | 6842              | 3438183          | 931         | 784         | 729,985       |
| Trichomycteridae | <i>Bullockia</i>   | <i>Bullockia maldonadoi</i> 1           | LBP3112   | 3112          | 69,683                  | 664               | 219602           | 559         | 224         | 125,236       |
|                  |                    | <i>Bullockia maldonadoi</i> 2           | LBP3112   | 19793         | 2,763,220               | 8305              | 4476703          | 1,430       | 786         | 1,123,436     |
|                  | <i>Cambeva</i>     | <i>Cambeva balios</i>                   | LBP607    | 7358          | 2,873,117               | 16531             | 7674658          | 658         | 468         | 307,696       |
|                  |                    | <i>Cambeva cubataonis</i>               | LBP3123   | 19690         | 2,040,601               | 8069              | 4605261          | 1,305       | 255         | 332,293       |
|                  |                    | <i>Cambeva iheringi</i>                 | LBP4512   | 24563         | 2,058,795               | 11012             | 5711264          | 1,573       | 849         | 1,336,039     |
|                  |                    | <i>Cambeva davisi</i>                   | LBP6383   | 29744         | 1,232,883               | 8218              | 4320816          | 1,541       | 810         | 1,247,508     |
|                  |                    | <i>Cambeva davisi</i> (Iguaçu)          | LBP1222   | 10598         | 2,095,335               | 8042              | 4465295          | 1,334       | 241         | 321,817       |
|                  |                    | <i>Cambeva pascuali</i>                 | LBP23323  |               | 1,653,916               | 7121              | 3874302          | 1,286       | 811         | 1,043,066     |
|                  |                    | <i>Cambeva perkos</i>                   | LBP17033  | 66403         | 2,606,839               | 8378              | 4666732          | 1,493       | 841         | 1,256,105     |
|                  |                    | <i>Cambeva poikilos</i>                 | LBP14693  | 61154         | 2,366,092               | 7599              | 4073261          | 1,496       | 758         | 1,134,105     |
|                  |                    | <i>Cambeva</i> sp (Santa Catarina)      | LBP3121   | 19686         | 1,839,591               | 9945              | 5412209          | 1,535       | 862         | 1,322,549     |
|                  |                    | <i>Cambeva stawiariski</i>              | LBP16165  | 66905         | 2,162,482               | 8092              | 4407820          | 1,352       | 239         | 323,317       |
|                  |                    | <i>Cambeva zonatus</i>                  | LBP2653   | 17409         | 1,483,970               | 7041              | 4017012          | 1,416       | 862         | 1,220,827     |
|                  | <i>Eremophilus</i> | <i>Eremophilus mutisii</i>              | ANSP11306 | no voucher    | 1,406,788               | 5411              | 2678729          | 1,268       | 661         | 838,429       |
|                  | <i>Ituglanis</i>   | <i>Ituglanis amazonicus</i>             | LBP2442   | 16211         | 3,185,776               | 8636              | 4868257          | 1,465       | 275         | 402,195       |
|                  |                    | <i>Ituglanis amphipotamus</i>           | LBP7416   | 35678         | 3,084,996               | 13996             | 6561776          | 1,489       | 770         | 1,146,164     |
|                  |                    | <i>Ituglanis boitata</i>                | LBP14546  | 60865         | 928,397                 | 5221              | 2853020          | 1,409       | 731         | 1,029,446     |
|                  |                    | <i>Ituglanis</i> cf <i>amazonicus</i>   | LBP11003  | 50532         | 860,615                 | 7247              | 4010231          | 1,424       | 806         | 1,147,357     |
|                  |                    | <i>Ituglanis</i> cf <i>eichorniarum</i> | LBP10777  | 49859         | 1,340,525               | 6170              | 3545189          | 1,291       | 244         | 315,198       |
|                  |                    | <i>Ituglanis</i> cf <i>goya</i>         | LBP17131  | 68592         | 1,530,163               | 6267              | 3548075          | 1,362       | 230         | 313,575       |
|                  |                    | <i>Ituglanis</i> cf <i>parkoi</i>       | LBP7995   | 37376         | 1,597,887               | 8787              | 4728872          | 1,469       | 280         | 411,147       |
|                  |                    | <i>Ituglanis eichorniarum</i>           | LBP4686   | 24825         | 1,023,343               | 7290              | 3934977          | 1,350       | 271         | 366,379       |
|                  |                    | <i>Ituglanis goya</i>                   | LBP17137  | 68599         | 1,139,418               | 5486              | 3140687          | 1,226       | 226         | 277,211       |
|                  |                    | <i>Ituglanis herberti</i>               | LBP676    | 8028          | 1,848,568               | 9627              | 5207612          | 1,453       | 287         | 416,383       |
|                  |                    | <i>Ituglanis parahybae</i>              | LBP10730  | 49719         | 525,319                 | 5445              | 2811435          | 1,387       | 695         | 964,347       |
|                  |                    | <i>Ituglanis parkoi</i>                 | LBP14153  | 59188         | 4,056,525               | 10038             | 5733370          | 1,517       | 290         | 440,251       |

| Subfamily | Genus                                           | Species                                              | Voucher      | Tissue number | Number of trimmed reads | Contigs assembled | Total bp contigs | UCE contigs | Mean length | Total bp UCES |
|-----------|-------------------------------------------------|------------------------------------------------------|--------------|---------------|-------------------------|-------------------|------------------|-------------|-------------|---------------|
|           |                                                 | <i>Ituglanis ramiroi</i>                             | LBP          | 63261         | 1,275,546               | 6121              | 3474181          | 1,384       | 857         | 1,185,591     |
|           |                                                 | <i>Ituglanis</i> sp (Araguaia)                       | LBP1857      | 13283         | 1,293,835               | 6321              | 3659124          | 1,420       | 865         | 1,228,122     |
|           |                                                 | <i>Ituglanis</i> sp (DasBranças)                     | LBP19465     | 77969         | 1,885,919               | 7326              | 3936340          | 1,406       | 232         | 325,727       |
|           |                                                 | <i>Ituglanis</i> sp (Cuiaba)                         | LBP12960     | 55688         | 1,089,983               | 6115              | 3407999          | 1,363       | 780         | 1,062,781     |
|           |                                                 | <i>Ituglanis</i> sp (Joao dias)                      | LBP7667      | 36475         | 1,515,489               | 7062              | 4073949          | 1,250       | 279         | 348,978       |
|           |                                                 | <i>Ituglanis</i> sp (Tapajos)                        | LBP16129     | 66849         | 1,465,298               | 5994              | 3385205          | 1,317       | 237         | 312,493       |
|           |                                                 | <i>Ituglanis</i> sp (Xingu)                          | INPA11584    | 11584         | 1,766,824               | 7833              | 3570426          | 1,221       | 653         | 797,903       |
|           | <i>Scleronema</i>                               | <i>Scleronema minutum</i>                            | LBP3310      | 19841         | 1,197,170               | 6972              | 3627542          | 1,440       | 782         | 1,126,696     |
|           | <i>Trichomycterus</i>                           | <i>Trichomycterus</i> aff. <i>spilosoma</i>          | LBP19339     | 77975         | 3,235,129               | 9625              | 5359917          | 1,541       | 259         | 398,748       |
|           |                                                 | <i>Trichomycterus</i> aff. <i>striatus</i>           | LBP19846     | 77968         | 4,995,362               | 7915              | 4517538          | 1,360       | 252         | 343,370       |
|           |                                                 | <i>Trichomycterus albinotatus</i>                    | LBP6326      | 29802         | 674,307                 | 4740              | 2443676          | 1,331       | 682         | 907,221       |
|           |                                                 | <i>Trichomycterus alternatus</i>                     | LBP1014      | 10261         | 1,136,511               | 6372              | 3342485          | 1,338       | 779         | 1,042,557     |
|           |                                                 | <i>Trichomycterus areolatus</i>                      | LBP3118      | 19819         | 2,820,795               | 8906              | 4643046          | 1,390       | 235         | 326,419       |
|           |                                                 | <i>Trichomycterus banneai</i>                        | LBP19847     | 77973         | 1,327,537               | 6842              | 3860594          | 1,502       | 802         | 1,204,079     |
|           |                                                 | <i>Trichomycterus brasiliensis</i>                   | LBP10675     | 49540         | 822,056                 | 4915              | 2210634          | 1,371       | 589         | 807,201       |
|           |                                                 | <i>Trichomycterus cachiraensis</i>                   | LBP19832     | 77957         | 3,218,412               | 10335             | 5654368          | 1,470       | 276         | 405,266       |
|           |                                                 | <i>Trichomycterus candidus</i>                       | LBP11630     | 58011         | 819,318                 | 6328              | 3256499          | 1,434       | 741         | 1,062,450     |
|           |                                                 | <i>Trichomycterus chapmani</i> 1                     | CZUT-IC17749 | L8            | 2,950,612               | 13053             | 6870330          | 1,571       | 342         | 537,762       |
|           |                                                 | <i>Trichomycterus chapmani</i> 2                     | CZUT-IC17061 | L9            | 2,724,440               | 12011             | 6179518          | 1,330       | 302         | 402,307       |
|           |                                                 | <i>Trichomycterus chiltoni</i>                       | ANSP180474   | 940           | 678,040                 | 5299              | 2803034          | 1,319       | 729         | 961,950       |
|           |                                                 | <i>Trichomycterus</i> cf. <i>areolatus</i> (La Laja) | LBP3113      | 3113          | 2,756,814               | 7878              | 3868680          | 1,315       | 664         | 872,819       |
|           |                                                 | <i>Trichomycterus</i> cf. <i>areolatus</i> (Maichin) | LBP3118      | 19820         | 1,088,389               | 8050              | 4086049          | 1,488       | 772         | 1,149,312     |
|           | <i>Trichomycterus</i> cf. <i>auroguttatus</i>   | LBP8374                                              | 40446        | 3,161,125     | 9508                    | 5001009           | 1,415            | 259         | 366,033     |               |
|           | <i>Trichomycterus</i> cf. <i>banneai</i>        | LBP19537                                             | 77971        | 2,488,653     | 12633                   | 6157627           | 1,507            | 824         | 1,241,775   |               |
|           | <i>Trichomycterus</i> cf. <i>brasiliensis</i> 1 | LBP8060                                              | 37829        | 1,479,875     | 8382                    | 4425849           | 1,446            | 802         | 1,159,552   |               |

| Subfamily | Genus | Species                                         | Voucher                | Tissue number | Number of trimmed reads | Contigs assembled | Total bp contigs | UCE contigs | Mean length | Total bp UCES |
|-----------|-------|-------------------------------------------------|------------------------|---------------|-------------------------|-------------------|------------------|-------------|-------------|---------------|
|           |       | <i>Trichomycterus</i> cf. <i>brasiliensis</i> 2 | LBP6247                | 29199         | 1,390,876               | 9465              | 4880824          | 1,575       | 819         | 1,289,937     |
|           |       | <i>Trichomycterus</i> cf. <i>brasiliensis</i> 3 | LBP10276               | 47976         | 1,646,306               | 9194              | 4694051          | 1,579       | 774         | 1,222,293     |
|           |       | <i>Trichomycterus</i> cf. <i>guianensis</i>     | ANSP179111             | 918           | 2,009,103               | 11582             | 5558685          | 973         | 613         | 596,228       |
|           |       | <i>Trichomycterus</i> cf. <i>knerii</i>         | LBP18717               | 18717         | 3,253,475               | 9873              | 5328560          | 1,504       | 258         | 387,392       |
|           |       | <i>Trichomycterus</i> cf. <i>oroyae</i>         | LBP3255                | 3255          | 2,991,667               | 8144              | 4005346          | 1,345       | 680         | 914,842       |
|           |       | <i>Trichomycterus</i> cf. <i>septemradiatus</i> | LBP5939                | 28065         | 3,687,832               | 10306             | 5030111          | 1,524       | 828         | 1,261,658     |
|           |       | <i>Trichomycterus</i> cf. <i>taenia</i>         | CZUT-IC<br>NJ82 T24437 | 90790         | 2,159,029               | 10053             | 5699383          | 1,535       | 330         | 507,156       |
|           |       | <i>Trichomycterus guianensis</i>                | LBP17444               | 69015         | 1,301,884               | 8759              | 4686001          | 1,494       | 854         | 1,276,601     |
|           |       | <i>Trichomycterus immaculatus</i>               | LBP8351                | 40419         | 2,062,904               | 8532              | 4385595          | 1,323       | 256         | 339,315       |
|           |       | <i>Trichomycterus itatiaye</i>                  | LBP16356               | 62282         | 2,610,414               | 13671             | 6052765          | 1,561       | 777         | 1,213,328     |
|           |       | <i>Trichomycterus mimosensis</i>                | LBP8290                | 38358         | 1,484,105               | 7567              | 3811910          | 1,455       | 750         | 1,090,882     |
|           |       | <i>Trichomycterus nigroauratus</i>              | LBP6301                | 29341         | 2,058,398               | 13082             | 5883948          | 1,503       | 763         | 1,146,749     |
|           |       | <i>Trichomycterus pauciradiatus</i>             | LBP16323               | 61977         | 2,328,959               | 10974             | 5238399          | 1,468       | 811         | 1,190,568     |
|           |       | <i>Trichomycterus pirabitira</i>                | LBP18381               | 72641         | 4,076,534               | 16242             | 7638686          | 1,634       | 812         | 1,326,841     |
|           |       | <i>Trichomycterus piratymbara</i>               | LBP9004                | 42138         | 2,566,246               | 12432             | 5681233          | 1,575       | 789         | 1,242,110     |
|           |       | <i>Trichomycterus pradensis</i>                 | LBP8291                | 38359         | 2,599,193               | 9641              | 4880259          | 1,395       | 245         | 341,564       |
|           |       | <i>Trichomycterus punctulatus</i>               | ANSP180733             | 905           | 4,039,139               | 14931             | 6588368          | 1,566       | 729         | 1,141,332     |
|           |       | <i>Trichomycterus quechuorum</i>                | ANSP180572             | 912           | 2,686,894               | 12970             | 6456491          | 1,565       | 844         | 1,321,563     |
|           |       | <i>Trichomycterus reinhardti</i>                | LBP16302               | 61942         | 4,662,949               | 18616             | 8714563          | 1,609       | 872         | 1,403,785     |
|           |       | <i>Trichomycterus ruitoquensis</i>              | LBP19838               | 77956         | 2,499,669               | 8962              | 5043610          | 1,474       | 257         | 378,738       |
|           |       | <i>Trichomycterus sandovali</i>                 | LBP19833               | 77946         | 2,924,535               | 9631              | 5071729          | 1,467       | 262         | 384,088       |
|           |       | <i>Trichomycterus septemradiatus</i>            | LBP6550                | 31670         | 2,230,258               | 15853             | 7314932          | 1,625       | 840         | 1,365,410     |
|           |       | <i>Trichomycterus</i> sp. (Arica-Mirim)         | LBP7640                | 36427         | 1,756,399               | 7251              | 4448990          | 1,297       | 259         | 335,719       |
|           |       | <i>Trichomycterus</i> sp. (Bonito)              | LBP11648               | 58088         | 40,059                  | 176               | 66129            | 238         | 164         | 39,145        |
|           |       | <i>Trichomycterus</i> sp. (Casca)               | LBP7669                | 36484         | 1,610,059               | 6953              | 4322946          | 1,220       | 254         | 309,670       |

| Subfamily      | Genus                | Species                                   | Voucher      | Tissue number | Number of trimmed reads | Contigs assembled | Total bp contigs | UCE contigs | Mean length | Total bp UCES |
|----------------|----------------------|-------------------------------------------|--------------|---------------|-------------------------|-------------------|------------------|-------------|-------------|---------------|
|                |                      | <i>Trichomycterus</i> sp. (Corrego)       | LBP10236     | 47789         | 1,820,364               | 7232              | 4423305          | 1,286       | 254         | 326,789       |
|                |                      | <i>Trichomycterus</i> sp. (Coxipo-açu)    | LBP7674      | 36488         | 1,371,402               | 6382              | 4001256          | 1,169       | 246         | 287,690       |
|                |                      | <i>Trichomycterus</i> sp. (Grande)        | LBP10282     | 47992         | 2,087,560               | 10779             | 5302037          | 1,495       | 835         | 1,248,650     |
|                |                      | <i>Trichomycterus</i> sp. (Grotão)        | LBP11631     | 58082         | 652,418                 | 4396              | 2101157          | 1,293       | 602         | 778,015       |
|                |                      | <i>Trichomycterus</i> sp (Manco)          | LBP19834     | 77958         | 2,261,658               | 8597              | 4848543          | 1,436       | 252         | 362,559       |
|                |                      | <i>Trichomycterus</i> sp (Paria)          | ANSP191472   |               | 2,128,871               | 11768             | 6178939          | 1,575       | 310         | 488,863       |
|                |                      | <i>Trichomycterus</i> sp. (Turvo)         | LBP9001      | 42123         | 1,112,897               | 4427              | 2187647          | 1,331       | 630         | 839,173       |
|                |                      | <i>Trichomycterus</i> sp. (São Francisco) | LBP11842     | 58147         | 3,414,540               | 14634             | 7246441          | 1,583       | 876         | 1,386,945     |
|                |                      | <i>Trichomycterus</i> sp. (Sepotuba)      | LBP8563      | 43332         | 1,888,949               | 7040              | 4167351          | 1,393       | 234         | 325,470       |
|                |                      | <i>Trichomycterus</i> sp. (Samaná Norte)  | CZUT-IC17547 | 17547         | 2,485,700               | 11084             | 5049425          | 1,537       | 646         | 992,273       |
|                |                      | <i>Trichomycterus</i> sp.4 (Riecito)      | CZUT-IC20105 | 20105         | 2,527,958               | 11673             | 6000276          | 1,535       | 294         | 451,516       |
|                |                      | <i>Trichomycterus</i> sp. (Rancheria)     | IMCN         | 91504         | 2,690,671               | 11965             | 5998933          | 1,620       | 322         | 522,117       |
|                |                      | <i>Trichomycterus trasandianus</i> 1      | LBP19845     | 77964         | 1,603,577               | 9189              | 4314896          | 1,427       | 744         | 1,062,375     |
|                |                      | <i>Trichomycterus trasandianus</i> 2      | CZUT-IC18148 | 657           | 1,160,527               | 7490              | 3597752          | 1,581       | 678         | 1,071,741     |
| Nematogenyidae | <i>Nematogenys</i>   | <i>Nematogenys inermis</i>                | LBP3105      | 3105          | 4,441,190               | 10466             | 5828883          | 1,797       | 816         | 1,465,919     |
| Callichthyidae | <i>Corydoras</i>     | <i>Callichthys callichthys</i>            | LBP17423     | 69177         | 2,182,778               | 12,711            | 1,278,242        | 1,633       | 500         | 633,030       |
|                |                      | <i>Corydoras elegans</i>                  | LBP57701     | 57701         | 1,833,170               | 14692             | 5762570          | 1,537       | 667         | 1,024,689     |
|                |                      | <i>Corydoras gossei</i>                   | LBP544       | 7171          | 1,921,329               | 7580              | 2950751          | 1,268       | 540         | 685,112       |
|                | <i>Hoplosternum</i>  | <i>Hoplosternum littorale</i>             | LBP466       | 7282          | 2,602,840               | 9071              | 4892979          | 1,668       | 761         | 1,268,768     |
| Scoloplacidae  | <i>Scoloplax</i>     | <i>Scoloplax dicra</i>                    | LBP11001     | 50522         | 3,626,939               | 9077              | 4897373          | 1,215       | 834         | 1,013,018     |
|                |                      | <i>Scoloplax distolothrix</i>             | LBP1938      | 14340         | 1,377,449               | 6233              | 3047277          | 1,164       | 741         | 862,643       |
| Loricaridae    | <i>Farlowella</i>    | <i>Farlowella oxyrryncha</i>              | LBP1558      | 11509         | 2,441,790               | 9893              | 4795114          | 1,523       | 769         | 1,171,052     |
|                | <i>Lamontichthys</i> | <i>Lamontichthys filamentosus</i>         | LBP162       | 4093          | 1,596,203               | 6885              | 3474601          | 1,554       | 715         | 1,110,981     |
|                | <i>Lasiancistrus</i> | <i>Lasiancistrus saetiger</i>             | LBP9156      | 42517         | 2,248,118               | 10793             | 5656534          | 1,731       | 835         | 1,444,573     |
| Astroblepidae  | <i>Astroblepus</i>   | <i>Astroblepus grixalvii</i>              | ANSP188920   | 188920        | 1,227,559               | 3666              | 1664830          | 1,008       | 629         | 633,778       |

| Subfamily  | Genus            | Species                   | Voucher  | Tissue number | Number of trimmed reads | Contigs assembled | Total bp contigs | UCE contigs | Mean length | Total bp UCES |
|------------|------------------|---------------------------|----------|---------------|-------------------------|-------------------|------------------|-------------|-------------|---------------|
|            |                  | <i>Astroblepus</i> sp.    | LBP19836 | 77952         | 2,309,522               | 5746              | 3219885          | 1,436       | 740         | 1,062,420     |
| Characidae | <i>Leporinus</i> | <i>Leporinus striatus</i> | LBP3180  | 16871         | 3,742,443               | 6626              | 2924078          | 1,397       | 425         | 593,801       |
|            |                  | <i>Total</i>              |          |               | 323,249,892             | 1,347,866         | 679,632,581      | 203,374     | 91,984      | 122,507,409   |
|            |                  | <i>average</i>            |          |               | 2,099,025               | 8,752             | 4,413,199        | 1,321       | 597         | 795,503       |

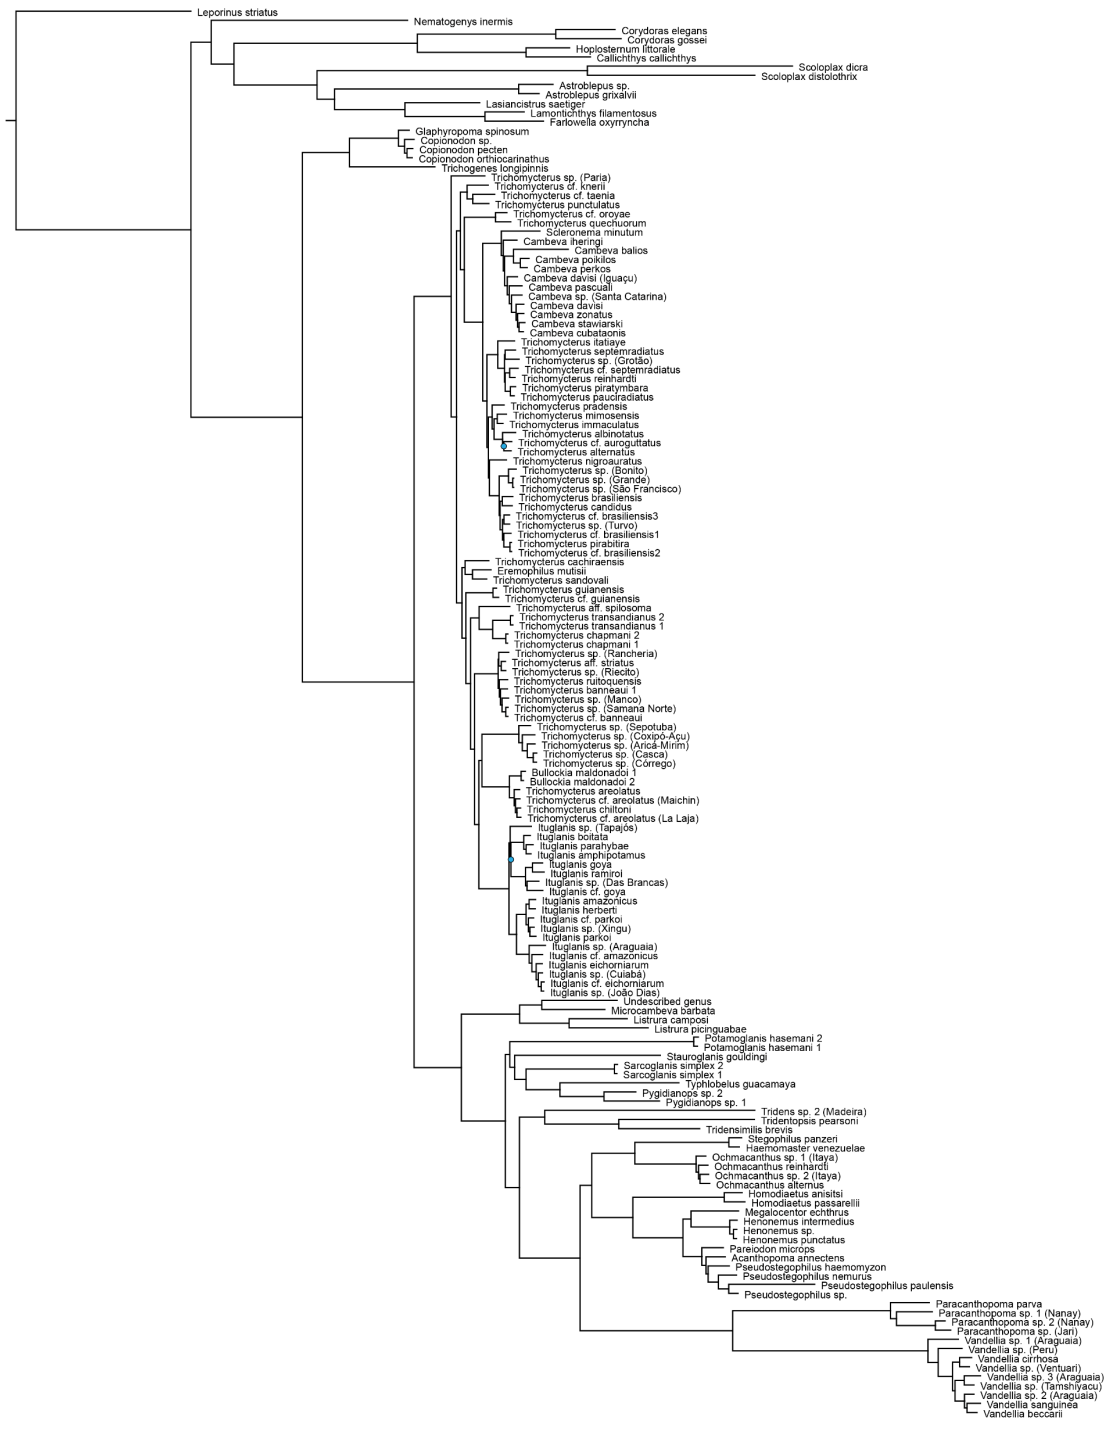

**Fig 1.** Bayesian inference using 50% complete matrix. Nodal support between 0.99-0.50 denoted by blue circle and support between 0.49-0.01 denoted by red circles.

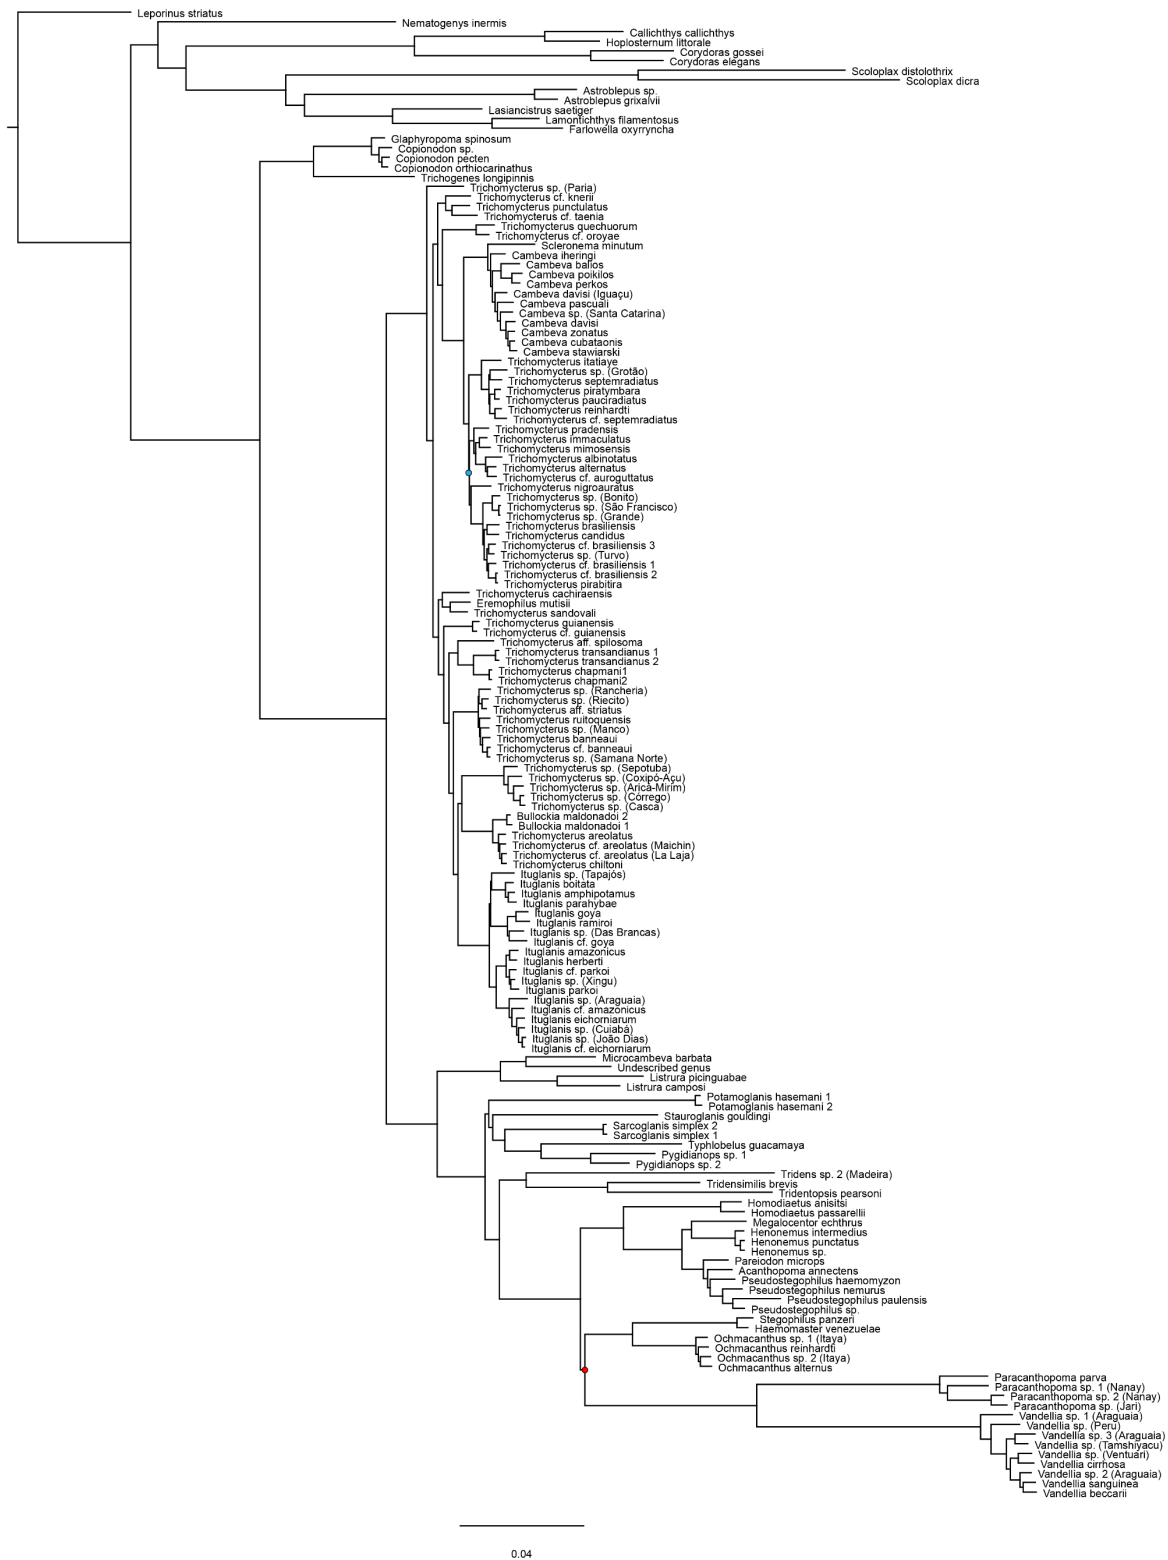

**Fig 2.** Bayesian inference using 90% complete matrix. Nodal support between 0.99-0.50 denoted by blue circle and support between 0.49-0.01 denoted by red circles.



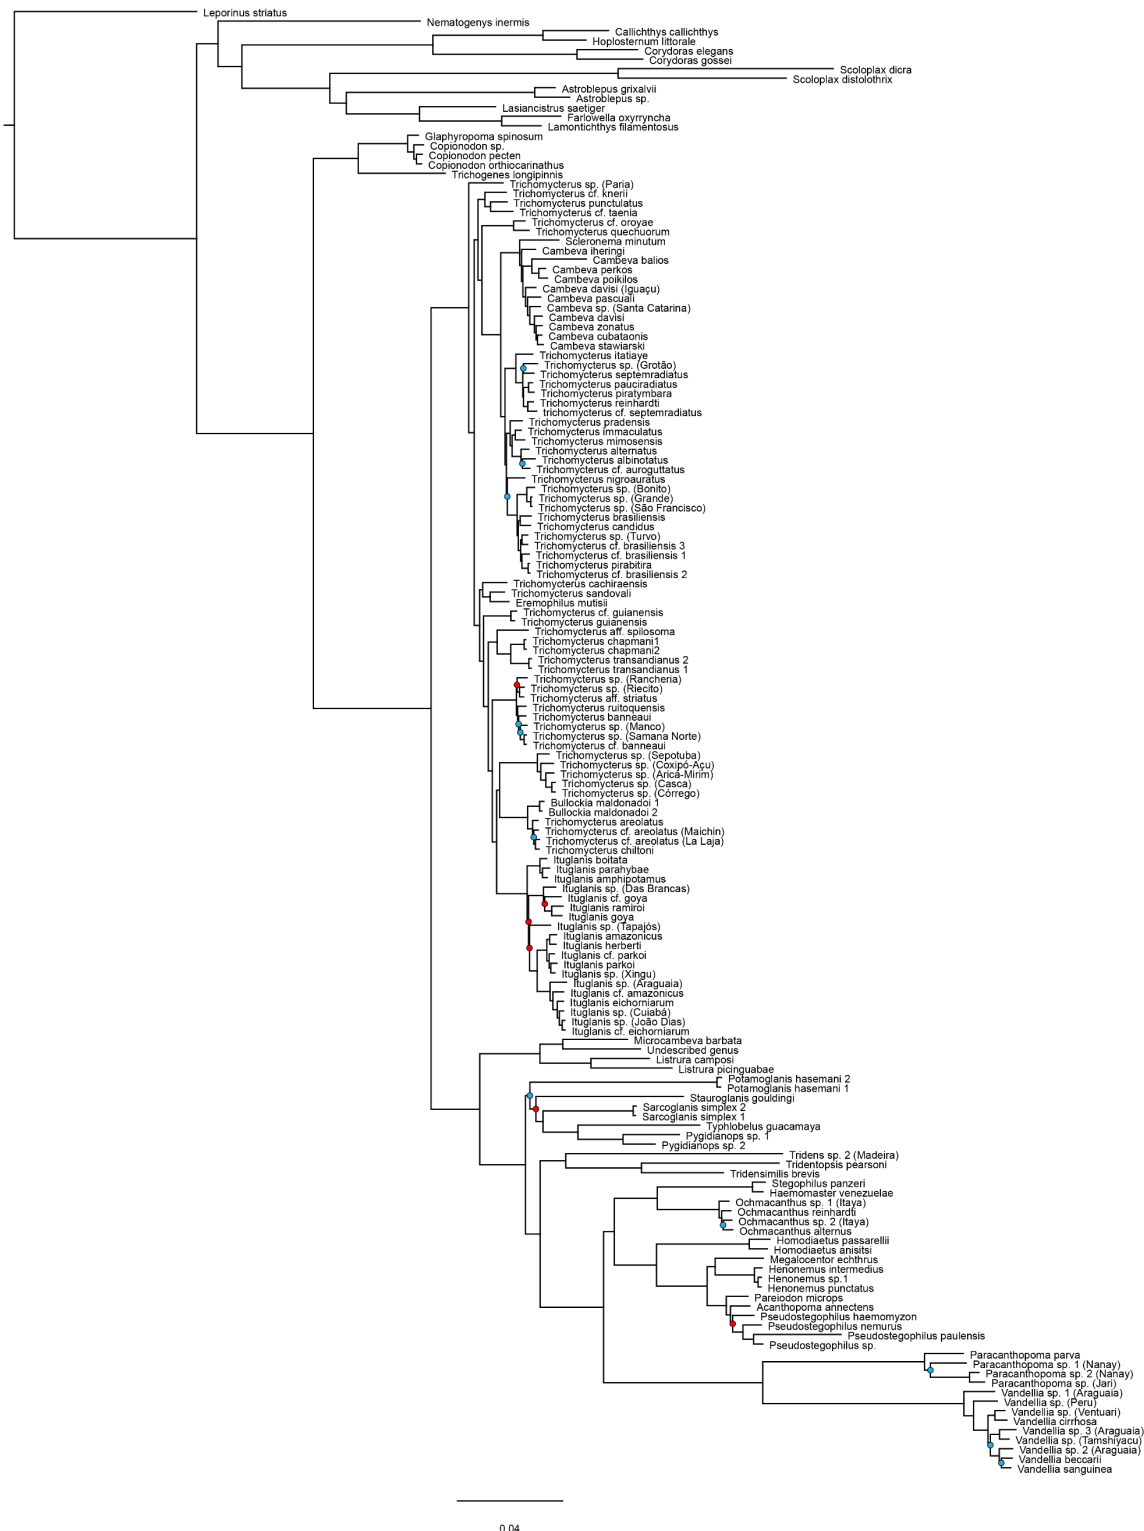

**Fig 3.** Maximum likelihood inference using 50% complete matrix. Nodal support between 0.99-0.50 denoted by blue circle and support between 0.49-0.01 denoted by red circles.

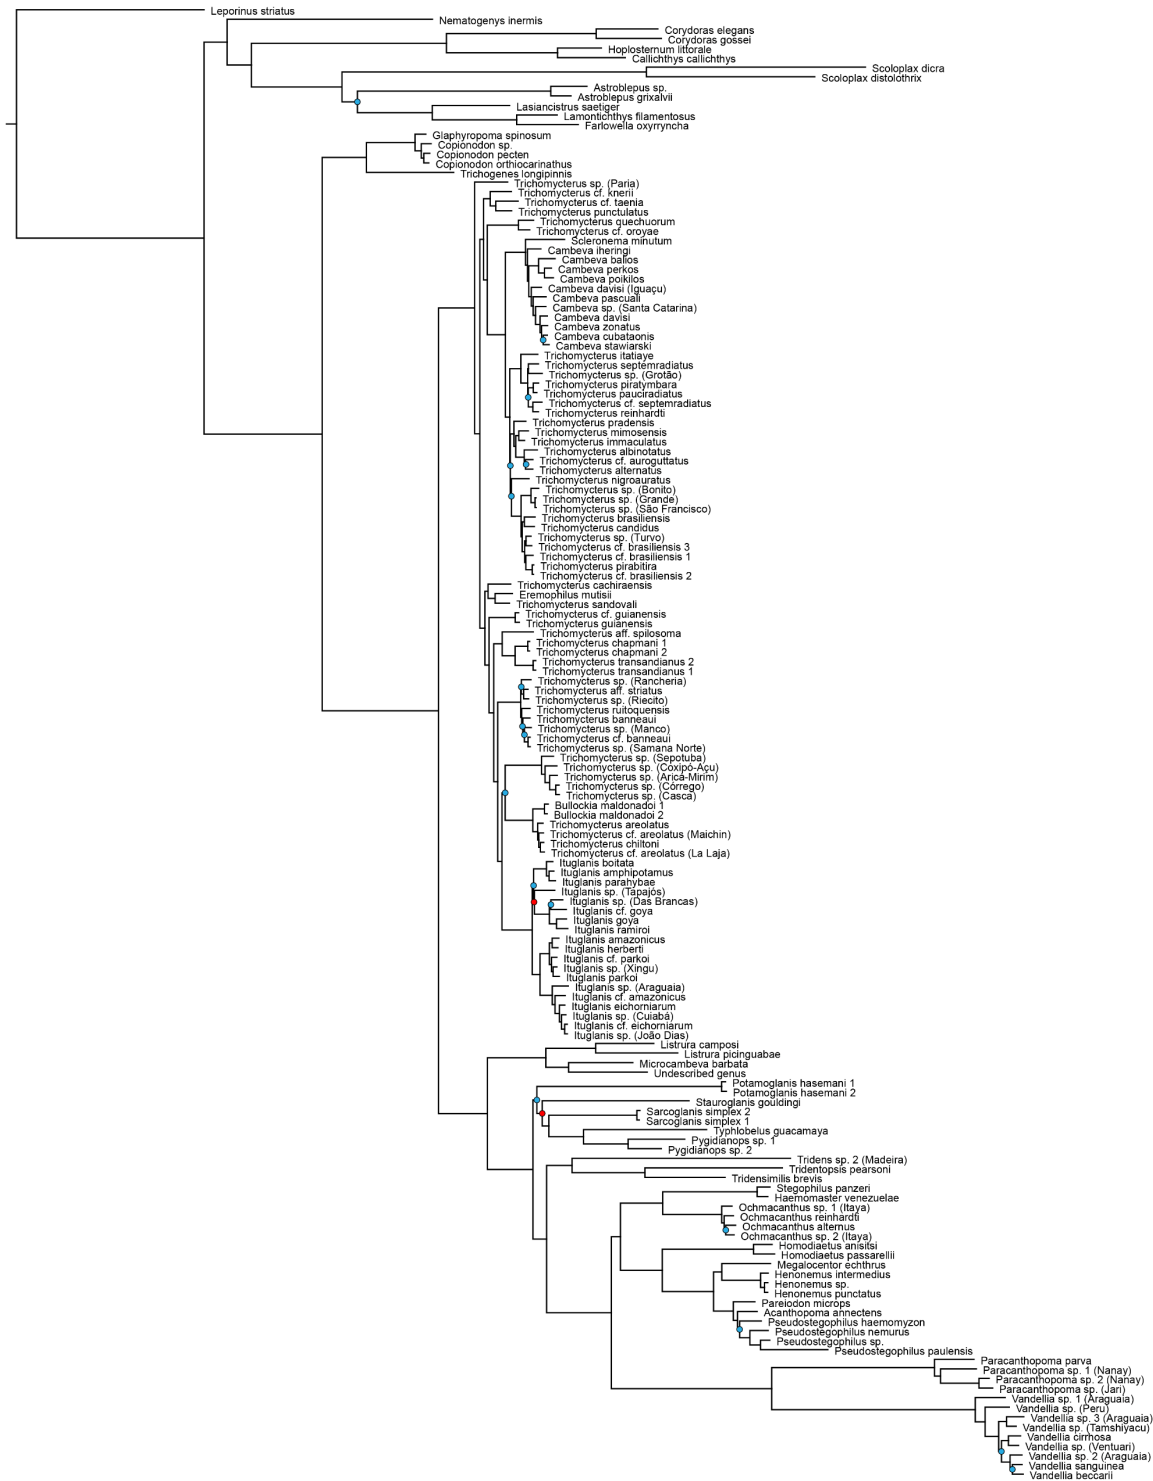

0.04

**Fig 4.** Maximum likelihood inference using 75% complete matrix. Nodal support between 0.99-0.50 denoted by blue circle and support between 0.49-0.01 denoted by red circles.

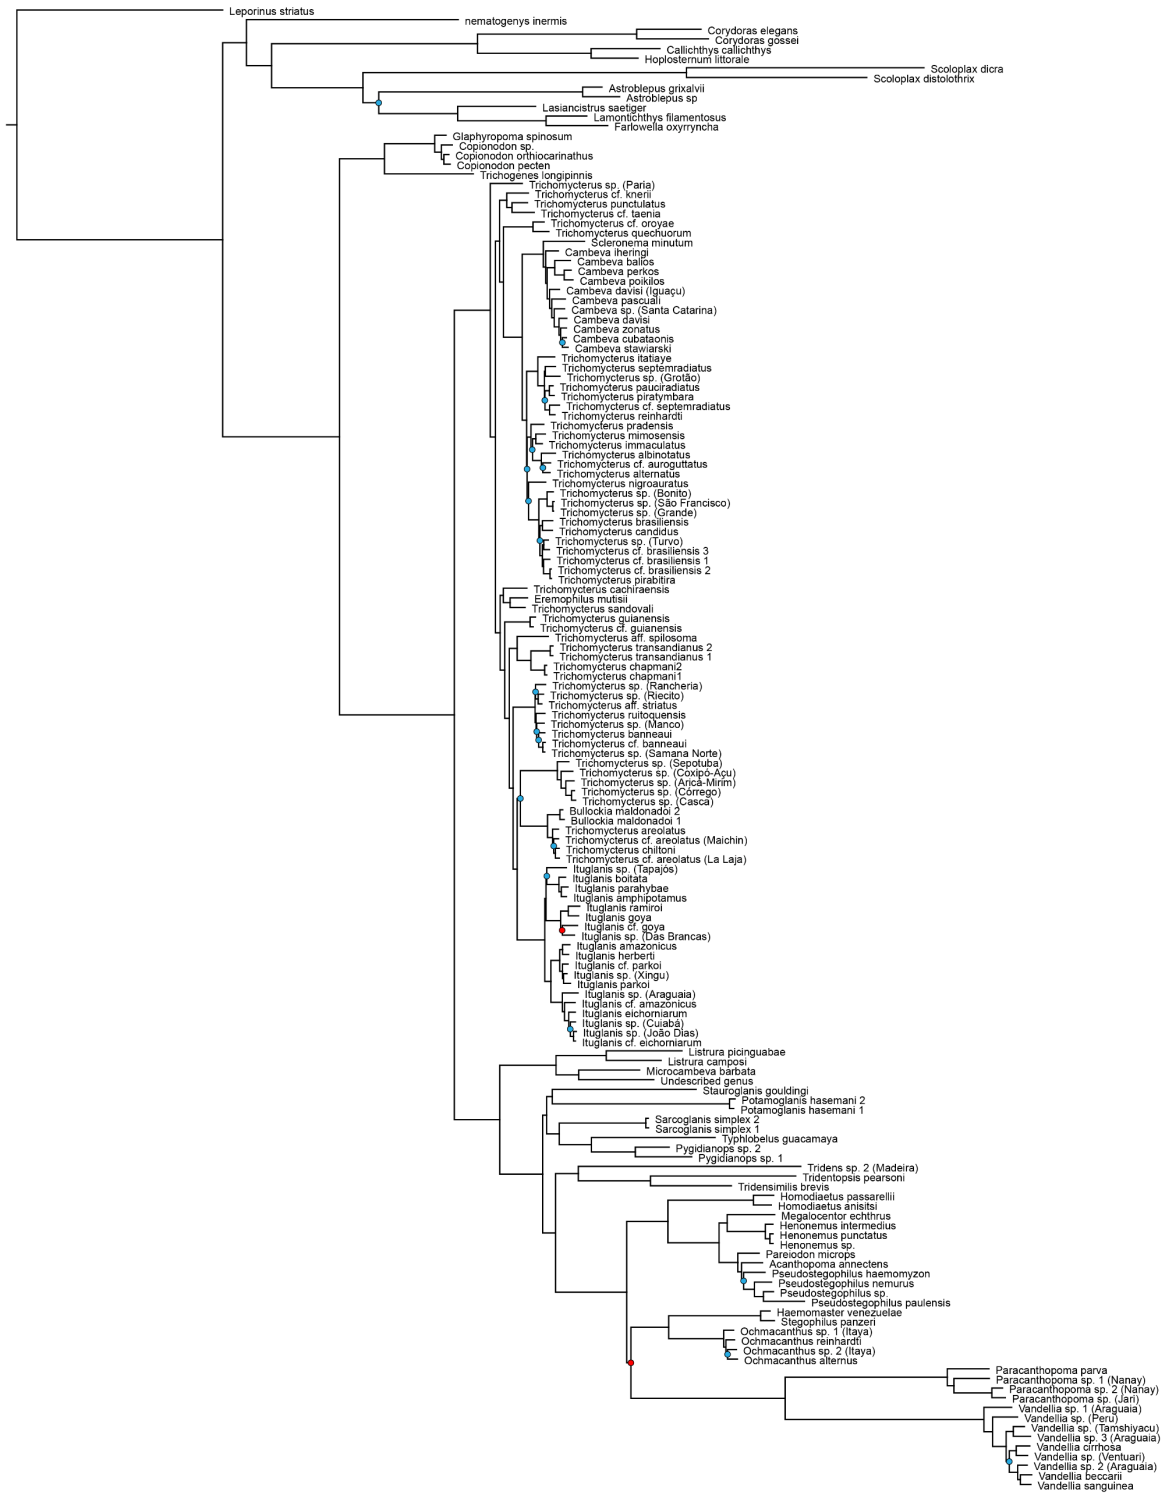

0.04

**Fig 5.** Maximum likelihood inference using 90% complete matrix. Nodal support between 0.99-0.50 denoted by blue circle and support between 0.49-0.01 denoted by red circles.

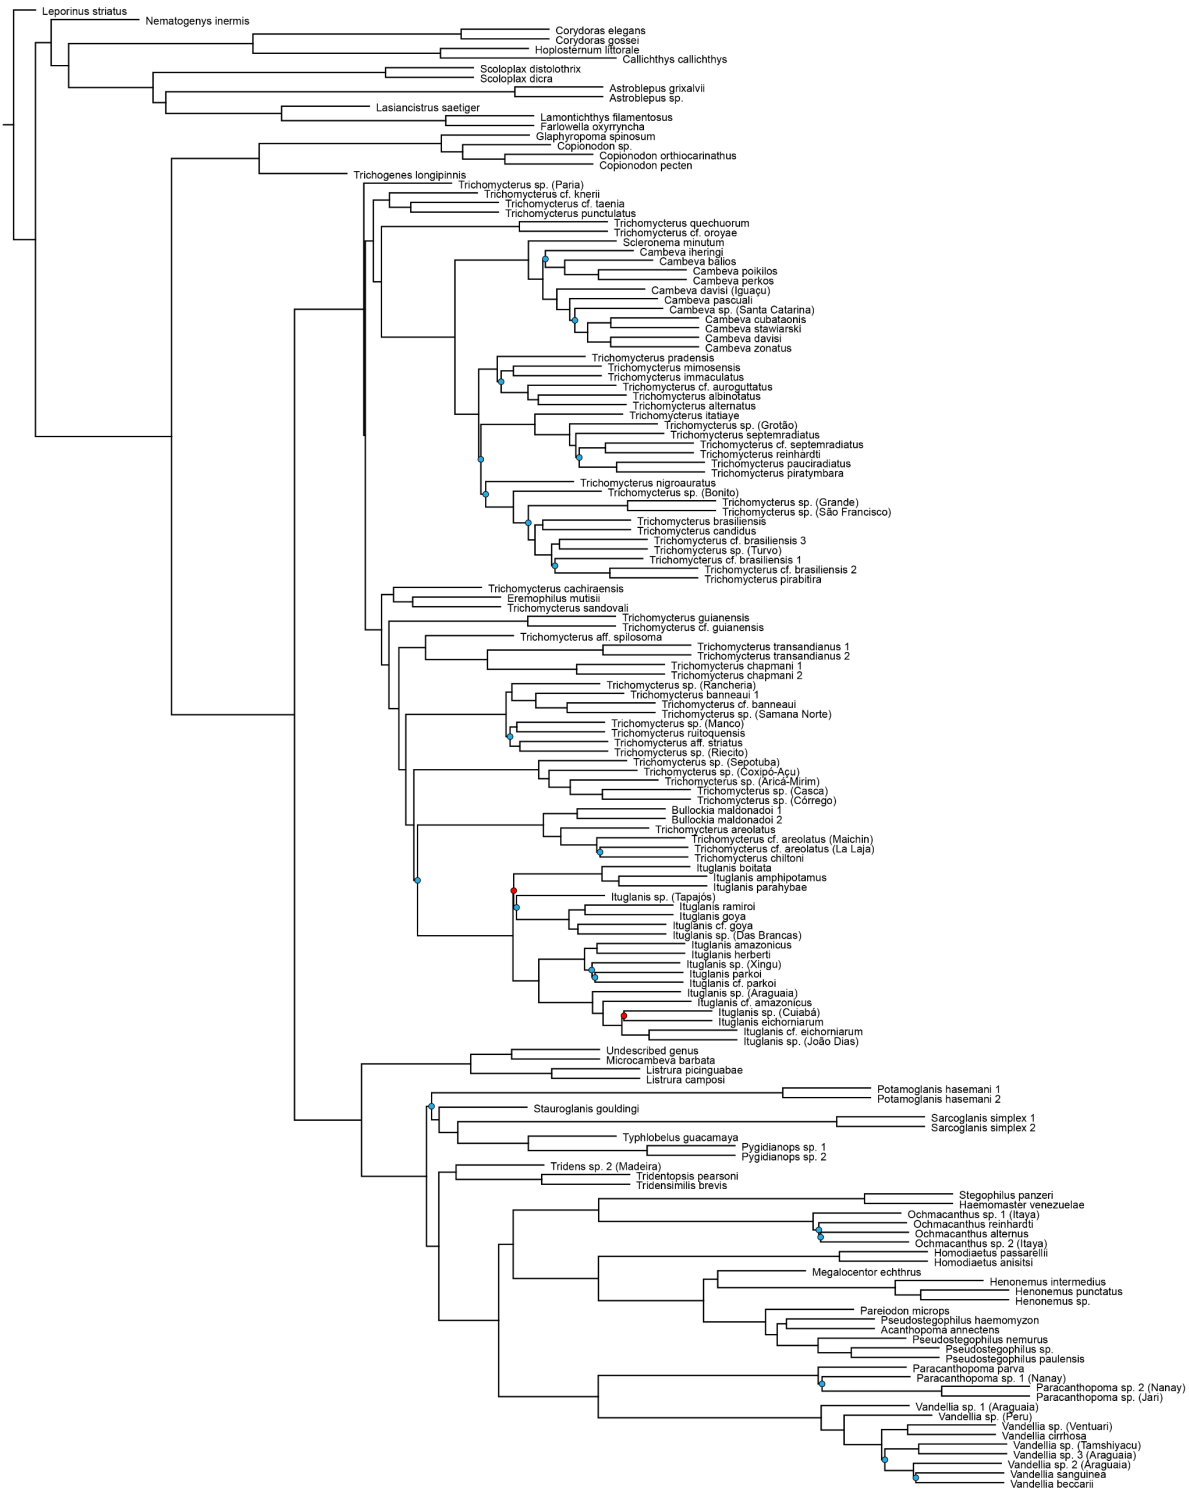

**Fig 6.** Species tree inference from 50% complete matrix. Nodal support between 0.99-0.50 denoted by blue circle and support between 0.49-0.01 denoted by red circles.

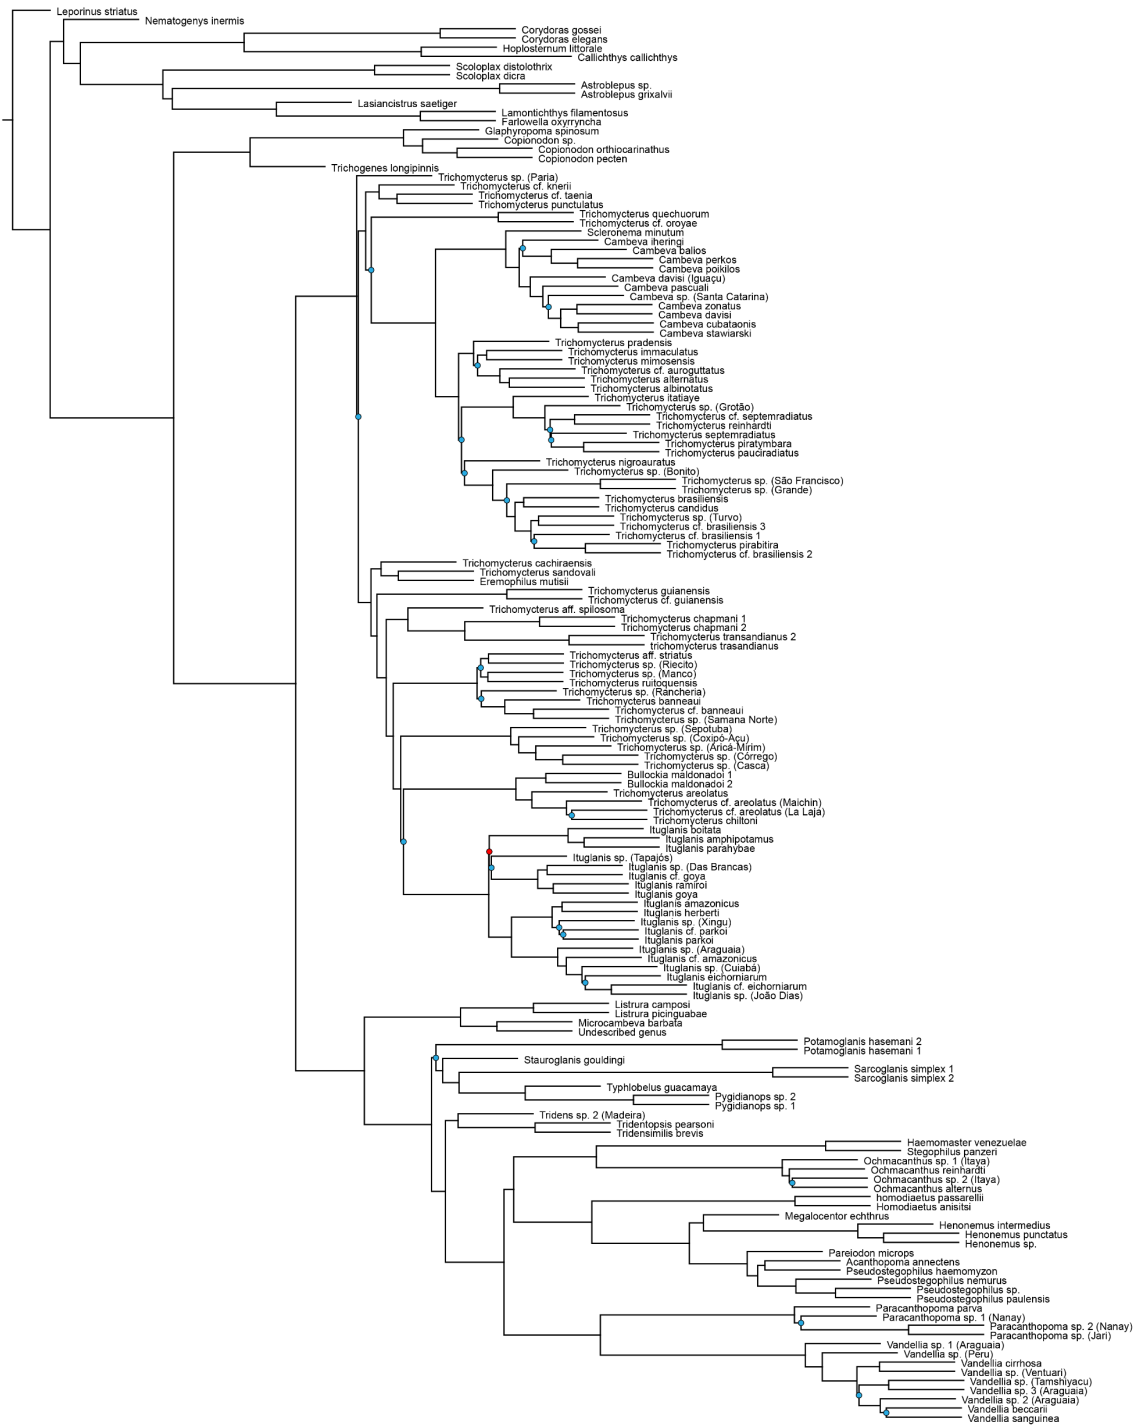

**Fig 7.** Species tree inference from 75% complete matrix. Nodal support between 0.99-0.50 denoted by blue circle and support between 0.49-0.01 denoted by red circles.

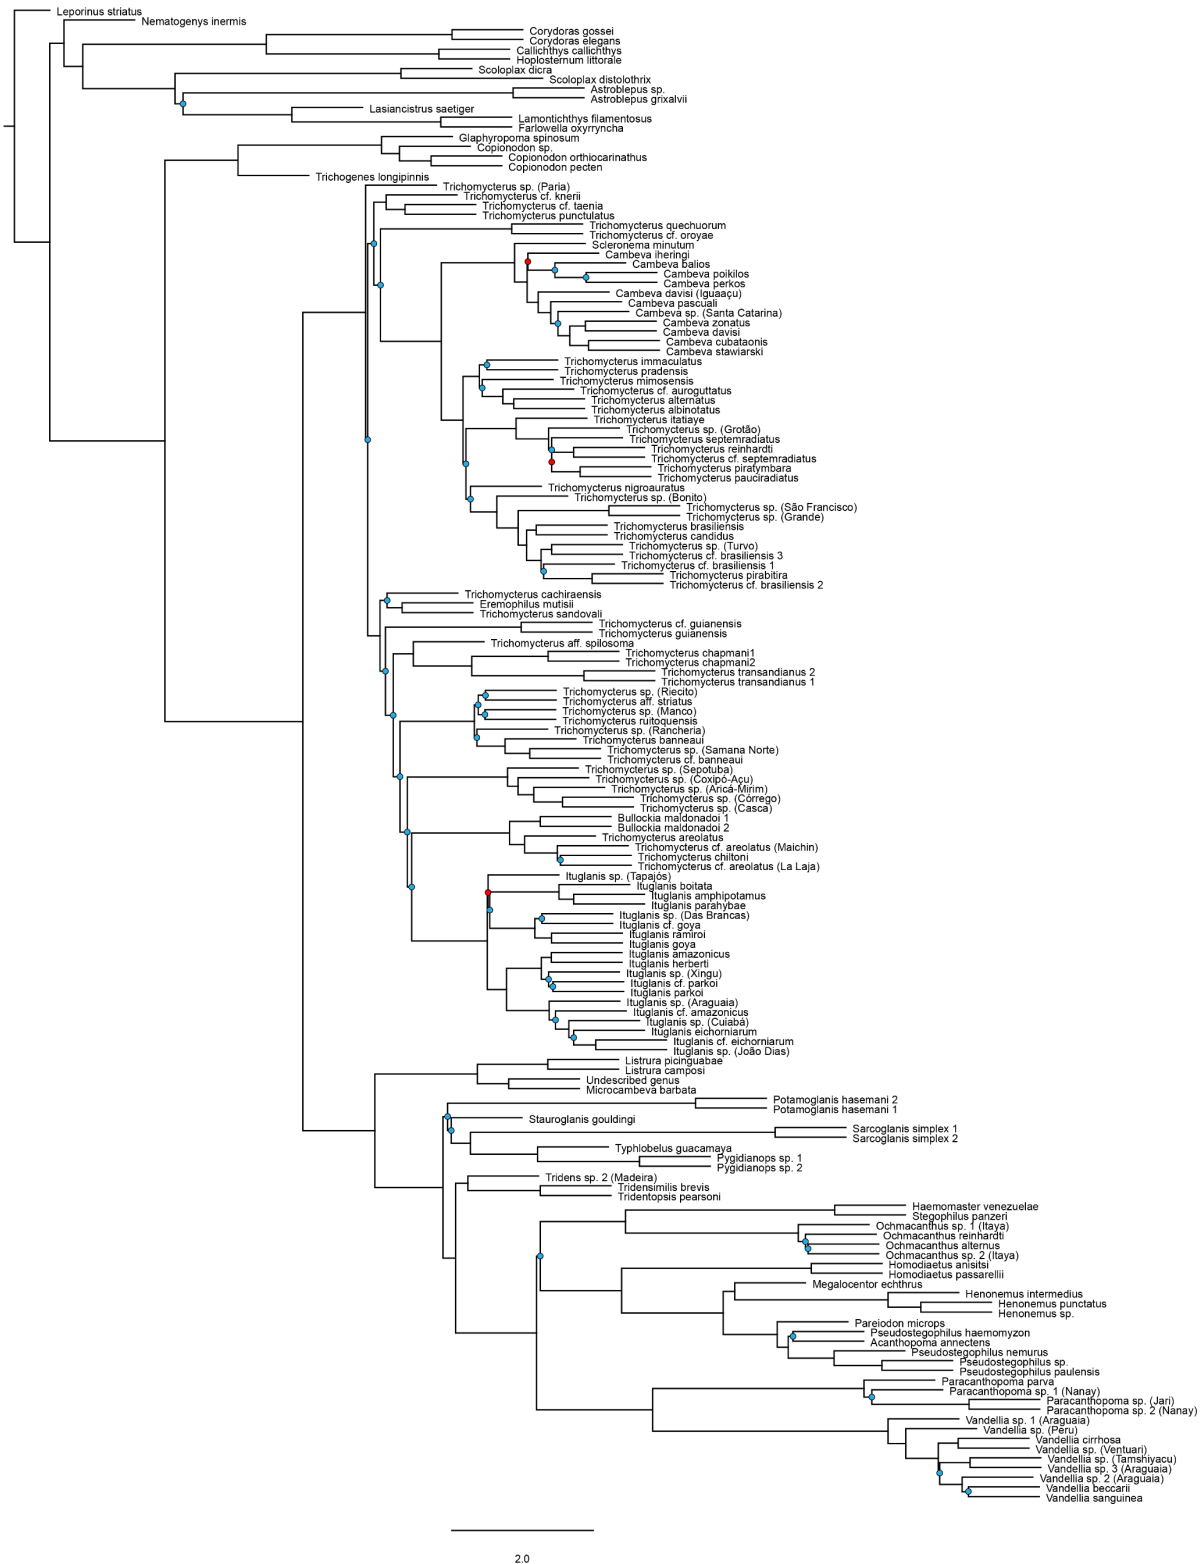

**Fig 8.** Species tree inference from 90% complete matrix. Nodal support between 0.99-0.50 denoted by blue circle and support between 0.49-0.01 denoted by red circles.
